# Supplementary material for: The effect of krill oil on longevity and locomotion: a pilot study
Source: Royal Society of Chemistry journal article supplement (doi:10.1039/d1mo00373a), 2021-12-01

## Supplementary

Table S1 List of metabolites significantly affected by treated with KO vs. CN

| Compound                                 | VIP          | Fold change<br>KO/CN | <i>p</i> -value |
|------------------------------------------|--------------|----------------------|-----------------|
| <b>Nicotinuric acid</b>                  | <b>3.786</b> | <b>1.524</b>         | <b>0.029</b>    |
| <b>Prostaglandin G2</b>                  | <b>3.438</b> | <b>1.232</b>         | <b>0.038</b>    |
| <b>4-Acetamidobutanoic acid</b>          | <b>2.607</b> | <b>4.499</b>         | <b>0.004</b>    |
| <b>Anandamide</b>                        | <b>2.584</b> | <b>2.307</b>         | <b>0.036</b>    |
| <b>Propylene glycol</b>                  | <b>2.530</b> | <b>1.488</b>         | <b>0.021</b>    |
| <b>D-arabino-Hex-3-ulose 6-phosphate</b> | <b>2.404</b> | <b>1.871</b>         | <b>0.008</b>    |
| <b>Ornithine</b>                         | <b>1.989</b> | <b>1.475</b>         | <b>0.001</b>    |
| <b>7-Dehydrocholesterol</b>              | <b>1.972</b> | <b>3.344</b>         | <b>0.000</b>    |
| <b>Trehalose</b>                         | <b>1.879</b> | <b>0.715</b>         | <b>0.001</b>    |
| <b>Urocanic acid</b>                     | <b>1.843</b> | <b>1357</b>          | <b>0.022</b>    |
| <b>Calcidiol</b>                         | <b>1.832</b> | <b>4.581</b>         | <b>0.003</b>    |
| <b>Uric acid</b>                         | <b>1.816</b> | <b>2.530</b>         | <b>0.027</b>    |
| <b>Palmitaldehyde</b>                    | <b>1.770</b> | <b>1.349</b>         | <b>0.042</b>    |
| <b>3,5-Dihydroxybenzoic acid</b>         | <b>1.718</b> | <b>0.240</b>         | <b>0.000</b>    |
| <b>L-Glutamic acid</b>                   | <b>1.712</b> | <b>1.432</b>         | <b>0.023</b>    |
| <b>Docosaehexaenoic acid</b>             | <b>1.646</b> | <b>1.632</b>         | <b>0.043</b>    |
| <b>L-Serine</b>                          | <b>1.640</b> | <b>0.332</b>         | <b>0.039</b>    |
| <b>Thymine</b>                           | <b>1.558</b> | <b>6.079</b>         | <b>0.001</b>    |
| <b>Glycerolphosphorylethanolamine</b>    | <b>1.539</b> | <b>2.251</b>         | <b>0.001</b>    |
| <b>Betaine</b>                           | <b>1.521</b> | <b>1.735</b>         | <b>0.005</b>    |
| <b>5-Hydroxyindoleacetaldehyde</b>       | <b>1.511</b> | <b>9.522</b>         | <b>0.015</b>    |
| Glycerol                                 | 2.304        | 1.086                | 0.204           |
| Oleic acid                               | 1.684        | 1.593                | 0.073           |
| myo-Inositol                             | 1.493        | 2.162                | 0.147           |
| Creatinine                               | 1.468        | 1.548                | 0.031           |
| Gluconic acid                            | 1.412        | 0.542                | 0.049           |
| Pseudouridine 5'-phosphate               | 1.406        | 2.405                | 0.035           |
| THF-L-glutamate                          | 1.403        | 3.670                | 0.000           |
| Citrulline                               | 1.395        | 2.110                | 0.093           |
| 3-Keto-4-methylzymosterol                | 1.393        | 0.943                | 0.330           |
| Beta-Tyrosine                            | 1.375        | 1.496                | 0.007           |
| Phosphoserine                            | 1.365        | 1.759                | 0.035           |
| Behenic acid                             | 1.336        | 1.542                | 0.091           |
| Episterol                                | 1.334        | 0.823                | 0.196           |
| 7-Dehydrodesmosterol                     | 1.328        | 0.722                | 0.069           |
| L-Phenylalanine                          | 1.306        | 3.623                | 0.001           |

|                                |       |       |       |
|--------------------------------|-------|-------|-------|
| Pantothenic acid               | 1.280 | 6.864 | 0.000 |
| L-Proline                      | 1.251 | 1.493 | 0.031 |
| Acetyl phosphate               | 1.208 | 0.932 | 0.637 |
| L-Alanine                      | 1.184 | 0.852 | 0.249 |
| NAD                            | 1.166 | 1.748 | 0.085 |
| L-Tyrosine                     | 1.162 | 1.530 | 0.062 |
| 4-Imidazolone-5-propionic acid | 1.155 | 1.541 | 0.028 |
| <i>p</i> -Aminobenzoic acid    | 1.143 | 0.982 | 0.368 |
| Eicosapentaenoic acid          | 1.139 | 1.688 | 0.033 |
| Palmitic acid                  | 1.137 | 1.245 | 0.178 |
| L-Histidine                    | 1.132 | 1.122 | 0.890 |
| Formylmethanofuran             | 1.117 | 4.974 | 0.004 |
| L-Threonine                    | 1.108 | 5.740 | 0.000 |
| Sphingosine                    | 1.078 | 2.593 | 0.048 |
| Xanthine                       | 1.056 | 2.125 | 0.050 |
| Pipecolic acid                 | 1.056 | 1.066 | 0.319 |
| D-Fructose                     | 1.044 | 0.248 | 0.044 |
| 8(R)-HPETE                     | 1.039 | 1.567 | 0.352 |

Table S2 List of metabolites significantly affected by treated with PC vs. CN

| Compound                                 | VIP          | Fold change<br>PC/CN | <i>p</i> -value |
|------------------------------------------|--------------|----------------------|-----------------|
| <b>3-Keto-4-methylzosterol</b>           | <b>4.246</b> | <b>1.164</b>         | <b>0.014</b>    |
| <b>5'-Deoxyadenosine</b>                 | <b>4.017</b> | <b>1.698</b>         | <b>0.000</b>    |
| <b>D-arabino-Hex-3-ulose 6-phosphate</b> | <b>3.469</b> | <b>2.197</b>         | <b>0.004</b>    |
| <b>D-Glucose</b>                         | <b>2.809</b> | <b>2.263</b>         | <b>0.007</b>    |
| <b>5'-Methylthioadenosine</b>            | <b>2.797</b> | <b>1.676</b>         | <b>0.005</b>    |
| <b>L-Serine</b>                          | <b>2.781</b> | <b>0.072</b>         | <b>0.001</b>    |
| <b>7-Dehydrocholesterol</b>              | <b>2.434</b> | <b>3.509</b>         | <b>0.001</b>    |
| <b>Phosphoserine</b>                     | <b>2.319</b> | <b>2.171</b>         | <b>0.003</b>    |
| <b>Galactosylsphingosine</b>             | <b>2.201</b> | <b>107.3</b>         | <b>0.000</b>    |
| <b>D-Mannose</b>                         | <b>2.149</b> | <b>2.614</b>         | <b>0.010</b>    |
| <b>Stearic acid</b>                      | <b>2.092</b> | <b>0.787</b>         | <b>0.034</b>    |
| <b>UDP-glucose</b>                       | <b>1.991</b> | <b>2.598</b>         | <b>0.002</b>    |
| <b>myo-Inositol</b>                      | <b>1.970</b> | <b>3.243</b>         | <b>0.013</b>    |
| <b>SM(d18:1/18:0)</b>                    | <b>1.945</b> | <b>1.623</b>         | <b>0.016</b>    |
| <b>Beta-Tyrosine</b>                     | <b>1.933</b> | <b>1.720</b>         | <b>0.015</b>    |
| <b>Eicosapentaenoic acid</b>             | <b>1.780</b> | <b>2.440</b>         | <b>0.016</b>    |
| <b>Calcidiol</b>                         | <b>1.736</b> | <b>3.348</b>         | <b>0.010</b>    |
| <b>Propylene glycol</b>                  | <b>1.547</b> | <b>1.329</b>         | <b>0.026</b>    |

|                                           |              |              |              |
|-------------------------------------------|--------------|--------------|--------------|
| <b>Glycerolphosphorylethanolamine</b>     | <b>1.525</b> | <b>2.056</b> | <b>0.016</b> |
| Nicotinuric acid                          | 3.002        | 1.383        | 0.250        |
| L-Histidine                               | 2.993        | 40.24        | 0.138        |
| 10-Formyltetrahydrofolate                 | 2.222        | 2.857        | 0.199        |
| Beta-Cortol                               | 1.626        | 1.358        | 0.292        |
| Behenic acid                              | 1.617        | 1.588        | 0.119        |
| Episterol                                 | 1.494        | 0.793        | 0.355        |
| Maltose 6'-phosphate                      | 1.402        | 3.658        | 0.017        |
| Pyroglutamic acid                         | 1.357        | 1.284        | 0.059        |
| L-Glutamic acid                           | 1.336        | 2.406        | 0.005        |
| Docosahexaenoic acid                      | 1.300        | 1.675        | 0.052        |
| NAD                                       | 1.278        | 1.684        | 0.124        |
| <i>p</i> -Aminobenzoic acid               | 1.274        | 1.015        | 0.379        |
| Palmitic acid                             | 1.217        | 1.315        | 0.048        |
| $\gamma$ -Amino- $\gamma$ -cyanobutanoate | 1.209        | 2.495        | 0.013        |
| Phosphorylcholine                         | 1.200        | 2.035        | 0.090        |
| ADP-glucose                               | 1.199        | 5.593        | 0.044        |
| 3,5-Dihydroxybenzoic acid                 | 1.192        | 0.341        | 0.001        |
| Purine                                    | 1.179        | 1.993        | 0.193        |
| Oleic acid                                | 1.158        | 1.308        | 0.315        |
| Pipecolic acid                            | 1.122        | 0.928        | 0.040        |
| L-Tyrosine                                | 1.120        | 1.509        | 0.259        |
| Creatinine                                | 1.116        | 1.597        | 0.070        |
| Ornithine                                 | 1.105        | 1.398        | 0.108        |
| Adenosine monophosphate                   | 1.093        | 1.594        | 0.371        |
| Alpha-D-Glucose                           | 1.085        | 1.544        | 0.142        |
| GDP                                       | 1.072        | 20.73        | 0.024        |
| L-Alanine                                 | 1.059        | 0.796        | 0.196        |
| L-Carnitine                               | 1.059        | 1.686        | 0.082        |
| 19(S)-HETE                                | 1.048        | 39.60        | 0.067        |
| Pregnenolone sulfate                      | 1.027        | 1.876        | 0.261        |
| Formylmethanofuran                        | 1.015        | 4.403        | 0.087        |

Table S3 List of metabolites significantly affected by treated with PC+KO vs. PC

| Compound                         | VIP          | Fold change<br>KO+PC/PC | <i>p</i> -value |
|----------------------------------|--------------|-------------------------|-----------------|
| <b>Prostaglandin G2</b>          | <b>6.737</b> | <b>1.393</b>            | <b>0.003</b>    |
| <b>3-Keto-4-methylzymosterol</b> | <b>4.996</b> | <b>0.848</b>            | <b>0.006</b>    |
| <b>7-Dehydrodesmosterol</b>      | <b>3.952</b> | <b>0.101</b>            | <b>0.000</b>    |
| <b>L-Threonine</b>               | <b>3.077</b> | <b>0.387</b>            | <b>0.016</b>    |

|                                        |              |              |              |
|----------------------------------------|--------------|--------------|--------------|
| <b>5-Aminoimidazole ribonucleotide</b> | <b>3.034</b> | <b>0.116</b> | <b>0.008</b> |
| <b>Phosphoserine</b>                   | <b>2.272</b> | <b>0.496</b> | <b>0.014</b> |
| <b>UDP-glucose</b>                     | <b>1.829</b> | <b>0.521</b> | <b>0.007</b> |
| <b>Calcidiol</b>                       | <b>1.829</b> | <b>0.358</b> | <b>0.007</b> |
| <b>Maltose 6'-phosphate</b>            | <b>1.744</b> | <b>0.196</b> | <b>0.002</b> |
| <b>D-Fructose</b>                      | <b>1.740</b> | <b>0.082</b> | <b>0.043</b> |
| <b>19(S)-HETE</b>                      | <b>1.732</b> | <b>2.823</b> | <b>0.013</b> |
| Acetylphosphate                        | 2.623        | 0.898        | 0.380        |
| D-Glucose                              | 2.497        | 0.589        | 0.062        |
| 10-Formyltetrahydrofolate              | 2.180        | 0.421        | 0.254        |
| L-Tyrosine                             | 1.953        | 0.804        | 0.439        |
| D-Mannose                              | 1.899        | 0.574        | 0.053        |
| D-arabino-Hex-3-ulose 6-phosphate      | 1.878        | 0.736        | 0.212        |
| 5'-Methylthioadenosine                 | 1.876        | 1.300        | 0.216        |
| Palmitic acid                          | 1.730        | 1.353        | 0.057        |
| Glycerol                               | 1.628        | 0.953        | 0.423        |
| Eicosapentaenoic acid                  | 1.586        | 0.560        | 0.161        |
| L-Tryptophan                           | 1.566        | 0.418        | 0.067        |
| Adenine                                | 1.538        | 1.385        | 0.064        |
| Stearic acid                           | 1.524        | 1.146        | 0.075        |
| Pyroglutamic acid                      | 1.524        | 0.782        | 0.088        |
| Uric acid                              | 1.507        | 0.426        | 0.101        |
| Anandamide                             | 1.501        | 1.498        | 0.382        |
| Oleic acid                             | 1.487        | 1.333        | 0.347        |
| 4-Acetamidobutanoic acid               | 1.445        | 0.313        | 0.137        |
| 7-Dehydrocholesterol                   | 1.393        | 1.337        | 0.096        |
| AMP                                    | 1.368        | 0.584        | 0.337        |
| L-Isoleucine                           | 1.343        | 1.375        | 0.083        |
| Docosahexaenoic acid                   | 1.340        | 0.657        | 0.167        |
| L-Glutamic acid                        | 1.326        | 0.437        | 0.021        |
| Galactosylsphingosine                  | 1.282        | 0.498        | 0.108        |
| Behenic acid                           | 1.275        | 0.793        | 0.166        |
| Alpha-N-Phenylacetyl-L-glutamine       | 1.273        | 0.421        | 0.014        |
| L-Lysine                               | 1.216        | 0.304        | 0.003        |
| <i>p</i> -Aminobenzoic acid            | 1.195        | 0.984        | 0.512        |
| D-Maltose                              | 1.179        | 1.504        | 0.220        |
| Palmitaldehyde                         | 1.159        | 1.140        | 0.261        |
| Octadecanamide                         | 1.159        | 1.241        | 0.244        |
| L-Serine                               | 1.139        | 5.148        | 0.221        |
| Hypoxanthine                           | 1.136        | 0.815        | 0.039        |
| 8(R)-HPETE                             | 1.133        | 1.420        | 0.490        |
| Pseudouridine 5'-phosphate             | 1.122        | 0.464        | 0.257        |
| Nicotinuric acid                       | 1.082        | 0.895        | 0.738        |
| myo-Inositol                           | 1.071        | 0.689        | 0.411        |

|                                           |       |       |       |
|-------------------------------------------|-------|-------|-------|
| $\gamma$ -Amino- $\gamma$ -cyanobutanoate | 1.038 | 0.478 | 0.089 |
| Palmitoleic acid                          | 1.014 | 1.166 | 0.119 |
| Alpha-D-Glucose                           | 1.008 | 1.325 | 0.273 |

Figure S1. The composition of krill oil (A) and polar compounds (B)

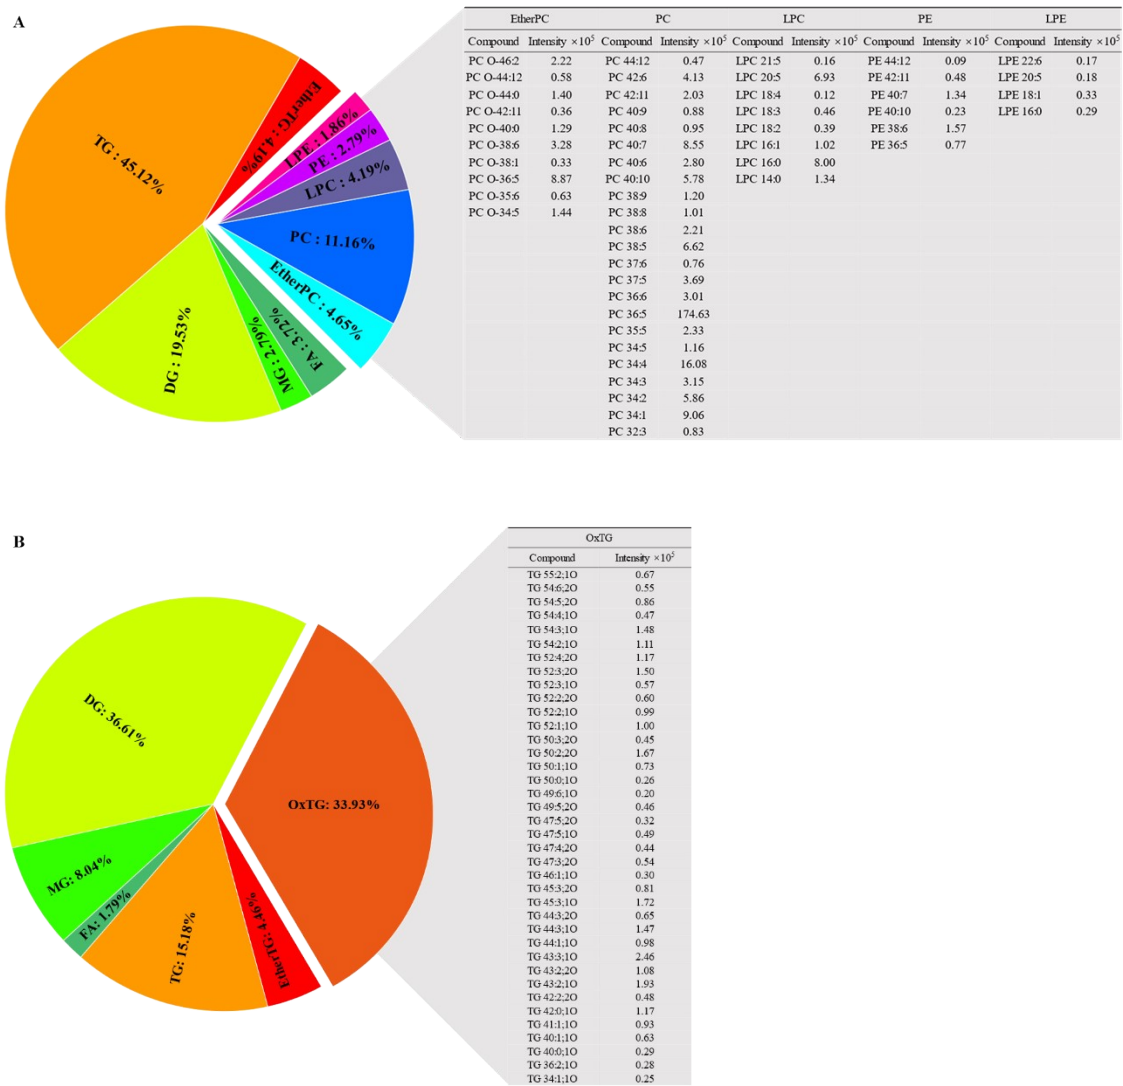

Supplement: d1mo00373a1.pdf [file d1mo00373a1.pdf]
