# Supplementary material for: The effect of krill oil on longevity and locomotion: a pilot study
Source: Royal Society of Chemistry journal article supplement (doi:10.1039/d1mo00373a), 2021-12-01
Supplement: d1mo00373a2.xlsx [file d1mo00373a2.xlsx]

## Sheet: GC-MS
Compound name	KEGG ID	CN_1	CN_2	CN_3	CN_4	CN_5	CN_6	KO_1	KO_2	KO_3	KO_4	KO_5	KO_6	PC_1	PC_2	PC_3	PC_4	PC_5	PC_6	KO+PC_1	KO+PC_2	KO+PC_3	KO+PC_4	KO+PC_5	KO+PC_6
L-Glutamic acid	C00025	0.827532	0.960096	1.16589	1.01611	1.01163	1.2176	0.971008	1.33255	1.76449	2.00052	1.19796	1.61217	1.41694	2.20574	1.19945	1.88615	2.2341	1.4863	1.0572	0.603184	0.851652	2.10266	0.857019	1.89436
2-ketoglutaric acid	C00026	0.205222	0.209099	0.0141487	0.245306	0.235541	0.302781	0.0141487	0.0141487	0.205889	0.0141487	0.214646	0.274919	0.0141487	0.0141487	0.22836	0.290636	0.0141487	0.253534	0.252127	0.0141487	0.196116	0.0141487	0.254772	0.244194
D-Glucose	C00031	1.19333	1.87312	0.752972	1.58072	2.43657	0.665453	1.21704	1.56447	1.1641	0.767678	2.29049	1.47934	2.62948	4.21586	2.28364	4.52522	3.72848	1.85636	2.28681	0.976426	3.56937	0.697111	2.4024	1.40704
Succinic acid	C00036	0.195356	0.202102	0.200747	0.178344	0.155956	0.15139	0.356917	0.232504	0.175669	0.173719	0.129542	0.191482	0.232154	0.218425	0.144062	0.322784	0.136208	0.180822	0.148335	0.201141	0.1658	0.180054	0.152042	0.155368
Glycine	C00037	0.0141487	0.15761	0.185847	0.223579	0.291865	0.206192	0.0141487	0.0141487	0.196292	0.0141487	0.167922	0.0141487	0.28701	0.0141487	0.155531	0.202674	0.173401	0.0141487	0.0141487	0.271202	0.131516	0.207805	0.0141487	0.158104
L-Alanine	C00041	2.04131	2.74403	3.04476	2.90622	2.08115	1.55996	1.76619	1.59961	2.06171	2.73834	1.92786	2.15772	1.81154	1.08271	1.56399	2.41288	2.86294	1.7062	1.51337	1.01706	1.05316	3.00782	1.35308	1.91041
L-Lysine	C00047	0.0141487	0.0141487	0.231836	0.0141487	0.198405	0.0141487	0.0141487	0.0141487	0.0141487	0.0141487	0.0141487	0.208787	0.322875	0.330055	0.278088	0.263825	0.255377	0.212537	0.0141487	0.0141487	0.258619	0.0141487	0.0141487	0.19059
L-Aspartic acid	C00049	0.259687	0.595344	0.40814	0.896043	0.617429	0.564745	0.33074	0.422566	0.467883	0.761158	0.591583	0.974959	0.460134	0.291617	0.472926	0.567174	0.641414	0.919294	0.377692	0.423257	0.951069	0.497325	0.92309	0.646127
Cytidine	C00063	1.29134	1.1073	1.40078	1.41743	1.55979	1.44869	1.89526	1.41297	1.27025	1.53153	1.19416	1.24874	1.43988	0.973923	1.23245	1.25817	1.10714	0.969157	1.55429	1.03111	1.48441	1.0436	1.41025	1.17822
Serine	C00065	0.0141487	0.138318	0.202484	0.252253	0.186118	0.156025	0.0141487	0.0141487	0.240669	0.0141487	0.167297	0.253466	0.17734	0.40386	0.400353	0.279395	0.247797	0.25677	0.290645	0.307954	0.142443	0.292719	0.127694	0.26137
L-Ornithine	C00077	0.798012	1.09824	1.25987	0.855854	0.969256	1.0015	1.12538	1.51181	1.54585	1.50361	1.51802	1.62228	1.44916	0.496124	1.15999	1.80769	1.96951	1.4807	1.19988	0.713378	0.642376	2.56292	1.21839	2.10596
L-Tryptophan	C00078	0.491297	0.656796	0.412165	0.694519	0.303704	0.33574	0.0141487	0.347099	0.565256	0.572877	0.330651	0.512262	1.12415	1.01606	0.414598	0.94012	0.360744	0.481915	0.0141487	0.912866	0.0141487	0.0141487	0.310757	0.546263
L-Phenylalanine	C00079	0.261752	0.29155	0.391579	0.469443	0.23442	0.391464	0.714194	0.609274	0.613757	0.74073	0.394424	0.622951	0.333303	0.811842	0.502078	0.938842	0.39805	0.652933	0.358589	0.589079	0.821186	0.293253	0.218689	0.725925
L-Tyrosine	C00082	3.53399	8.29671	4.41225	4.32914	4.39938	3.68622	6.32768	6.22884	4.68029	7.56432	6.04692	6.78509	3.97839	12.1709	4.95526	11.102	8.41155	8.48298	4.2861	4.07316	3.19599	12.8737	6.81301	8.25356
Urea	C00086	1.08771	0.993379	1.21774	1.0412	1.01652	1.13649	1.59787	1.12446	0.747701	0.931353	0.819117	0.897976	1.27191	1.25435	0.743068	1.02671	0.929091	1.0186	1.13569	1.1093	0.697902	0.994232	0.827808	0.779329
Sulfurous acid	C00094	0.427421	0.37301	0.341602	0.381484	0.271844	0.365191	0.435104	0.404785	0.239658	0.263241	0.251528	0.301786	0.322721	0.279296	0.237447	0.252776	0.255911	0.226055	0.21984	0.357034	0.306951	0.253155	0.19324	0.292022
d-Fructose	C00095	0.221611	0.30963	0.537331	0.269815	0.0141487	0.226598	0.0141487	0.320417	0.0141487	0.0141487	0.0141487	0.0141487	0.356637	1.43691	0.539167	0.238661	0.0141487	0.478843	0.0141487	0.0141487	0.0141487	0.0141487	0.0141487	0.179278
Uracil	C00106	0.217206	0.0141487	0.0141487	0.0141487	0.0141487	0.241355	0.34297	0.0141487	0.293408	0.275256	0.283044	0.253187	0.0141487	0.246264	0.28183	0.389542	0.413297	0.367153	0.0141487	0.21829	0.0141487	0.250149	0.23004	0.271852
Glycerol	C00116	16.8046	17.0918	18.312	16.7321	16.7563	14.1873	21.0714	18.51	14.4922	18.211	17.0112	19.1995	16.1748	18.285	14.7676	15.9674	14.7403	16.3525	13.2729	18.3139	14.4684	15.8489	13.9166	15.9021
Myo-Inositol	C00137	0.0141487	0.567456	0.884136	0.0141487	0.0141487	0.887838	0.449955	0.83463	1.05617	1.14295	0.0141487	1.65225	1.49884	0.587943	1.56523	2.15373	0.759877	1.15771	0.0141487	2.45033	0.614573	0.0141487	0.503619	1.72368
Adenine	C00147	1.4598	1.95621	1.81907	0.960957	1.16064	1.29149	1.08768	1.37961	0.936014	1.59747	1.58345	1.56808	0.951018	0.697272	1.20738	1.61156	1.37635	1.50742	1.08941	2.1064	1.55532	1.62562	2.28436	1.51966
L-Proline	C00148	0.426301	0.384054	0.610954	0.631806	0.412175	0.543125	0.480192	0.750049	0.923025	1.03413	0.526842	0.77818	0.484991	0.271538	0.780871	1.06266	0.546421	0.630842	0.470826	0.79448	0.245147	0.510556	0.342504	0.772554
Asparagine	C00152	0.348085	0.695618	0.949846	0.449876	0.583713	0.609068	0.0141487	0.827347	0.836097	1.20483	0.495994	0.88492	0.909229	0.628962	0.852296	0.791069	0.704475	0.75189	0.691882	0.600934	0.411085	0.899145	0.45785	1.0109
Citric acid	C00158	0.138447	0.162167	0.161895	0.280749	0.156814	0.127722	0.0141487	0.227848	0.214821	0.243564	0.163927	0.21036	0.0141487	0.278129	0.129323	0.182318	0.194854	0.196245	0.254867	0.147314	0.128175	0.218875	0.173556	0.237183
D-Mannose	C00159	0.679066	1.07819	0.0141487	0.812188	1.48525	0.0141487	0.730118	0.786627	0.630787	0.0141487	1.13011	0.790166	1.44961	2.18318	1.25099	2.47612	2.28526	1.02613	1.25896	0.527254	1.96702	0.395328	1.24785	0.72489
Thymine	C00178	0.0141487	0.0141487	0.0141487	0.0141487	0.0141487	0.279177	0.483007	0.183404	0.307857	0.416957	0.289764	0.446281	0.0141487	0.0141487	0.0141487	0.267848	0.29036	0.143712	0.0141487	0.0141487	0.0141487	0.0141487	0.0141487	0.268845
Benzoic Acid	C00180	0.554795	0.419461	0.510672	0.373015	0.447608	0.251077	0.152217	0.0141487	0.164363	0.155199	0.114772	0.0141487	0.145565	0.0141487	0.29474	0.115757	0.160975	0.141832	0.0141487	0.208021	0.158031	0.24707	0.0141487	0.0141487
L-Valine	C00183	0.0141487	0.183548	0.155233	0.0141487	0.177832	0.173951	0.0141487	0.0141487	0.169332	0.0141487	0.0141487	0.153395	0.329595	0.280589	0.136581	0.246481	0.147186	0.205699	0.0141487	0.249879	0.245012	0.240526	0.139189	0.216556
Lactic Acid	C00186	3.89209	5.71149	4.78831	3.75224	3.793	2.53051	5.01185	7.12548	3.25881	3.83703	2.77289	2.74811	6.13138	3.84143	3.35906	6.72965	2.87769	2.65198	5.31658	3.04485	3.20344	4.37578	2.54592	3.20529
L-Threonine	C00188	0.612324	2.29335	2.63873	2.75035	2.93446	2.33265	0.928308	2.26178	2.43022	1.13847	2.35209	2.49041	2.34148	2.90846	2.24528	2.3457	2.34507	2.24504	0.621012	0.0141487	0.0141487	2.72128	0.0141487	2.20546
Ethanolamine	C00189	0.411881	0.592241	0.515715	0.871997	0.427059	0.445886	0.534795	0.456776	0.60556	0.718237	0.472431	0.554692	0.726906	0.848768	0.554143	0.580397	0.675185	0.485297	0.611539	0.301177	0.484304	0.729603	0.349605	0.613176
D-Arabinose	C00216	0.18691	0.204305	0.219246	0.204247	0.182621	0.191361	0.0141487	0.25218	0.161807	0.209828	0.164021	0.209299	0.171918	0.223509	0.188333	0.151071	0.15662	0.17534	0.0141487	0.166304	0.147022	0.175508	0.140685	0.152735
Palmitic Acid	C00249	1.98013	1.09968	1.23514	1.39775	1.04677	1.45401	2.14844	1.18079	1.33016	1.88701	1.4226	2.25626	2.08687	1.75931	2.14963	1.4266	1.96413	1.41172	2.28462	3.04599	2.79615	1.52774	3.09594	1.86496
D-Gluconic acid	C00257	0.790908	0.728514	0.861069	0.918629	0.429149	0.464219	0.564683	0.0141487	0.570384	0.0141487	0.526654	0.582218	0.817056	0.889822	0.646928	0.663894	0.467161	0.533978	0.752109	0.848864	0.728838	0.570275	0.731342	0.383737
Hypoxanthine	C00262	1.47144	1.18404	1.48095	1.23943	1.18697	1.18377	1.33356	1.46706	0.888043	1.05838	0.923998	0.91317	1.21588	1.34942	1.0951	0.911189	1.14613	1.13235	0.817443	0.912853	1.13097	1.13596	0.786989	0.796682
Spermidine	C00315	0.0141487	0.0141487	0.0141487	0.0141487	0.0141487	0.0141487	0.0141487	0.0141487	0.216009	0.0141487	0.188761	0.0141487	0.302118	0.26225	0.0141487	0.244361	0.217167	0.212404	0.0141487	0.0141487	0.273043	0.256582	0.0141487	0.0141487
L-Citrulline	C00327	0.298555	0.291603	0.243488	0.543493	0.34893	0.365932	0.489248	0.230158	0.66385	0.580909	0.371143	0.471719	0.485796	0.463514	0.608911	0.578546	0.651024	0.432259	0.342724	0.316396	0.671823	0.334239	0.724398	0.283356
D-Glucosamine	C00329	0.524942	0.532831	0.763977	0.647326	0.862683	1.10124	0.395544	0.666948	0.655819	0.710204	1.1509	1.07504	0.474405	0.584958	0.55764	0.603968	0.941765	1.0756	0.620796	0.503844	0.726218	1.0606	1.24347	1.01963
L-Isoleucine	C00407	1.16702	1.07145	1.05856	0.969754	0.979971	0.936741	1.066	0.887016	0.990749	1.01878	0.715461	1.2781	0.523572	0.66106	1.0051	1.44762	0.981535	1.04704	0.941877	1.53473	1.41552	1.63932	0.88382	1.37554
Pipecolic acid	C00408	5.31868	5.13378	5.2572	5.04683	4.90933	4.9082	6.60057	5.92777	4.8931	5.53077	4.45212	5.18559	4.78096	5.30533	4.54145	4.55337	4.85609	4.32164	4.64671	4.73634	4.66158	4.40579	4.72639	4.42044
Dihydrouracil	C00429	0.0141487	0.530195	0.796327	0.592107	0.0141487	0.500839	0.0141487	0.771764	1.22042	0.0141487	0.58612	0.955778	0.958301	0.0141487	0.737917	0.902714	0.683532	0.716699	0.0141487	1.15541	0.0141487	0.0141487	0.0141487	1.05166
Ethanol	C00469	0.514758	0.726205	0.504265	0.576843	0.709135	0.494185	0.822323	0.864347	0.588562	0.617902	0.658724	0.705585	0.496964	0.462901	0.640104	0.689065	0.663352	0.656563	0.679685	0.61978	0.683169	0.629491	0.635341	0.596461
Tyramine	C00483	0.159214	0.175397	0.176744	0.158064	0.176054	0.152292	0.296765	0.23054	0.141037	0.169879	0.141162	0.174667	0.167349	0.174382	0.169863	0.159342	0.155031	0.152118	0.126221	0.166084	0.150981	0.186846	0.148905	0.16833
Pentanedioic acid	C00489	0.267254	0.595768	0.355297	0.782998	0.441747	0.436176	0.320647	0.572653	0.667968	0.571745	0.53644	0.615991	0.522183	0.838314	0.583525	0.64782	0.683843	0.599565	0.670173	0.911637	0.375752	0.78791	0.409415	0.696522
Propylene glycol	C00583	1.75727	1.66418	1.75261	2.69472	1.66642	2.25663	3.74353	3.1788	2.13224	3.72126	2.04113	2.72618	2.02503	2.88778	2.1546	3.06989	2.96067	2.57697	3.04454	1.80107	2.51805	2.45926	2.66057	3.39154
Creatinine	C00791	0.630931	0.953133	0.475524	0.96888	0.57328	0.472813	1.06982	0.868673	0.838108	0.803755	1.54391	1.18304	1.20145	1.55398	0.461621	1.55702	0.905819	0.826532	1.16213	1.06441	0.3188	1.40525	0.472122	0.787279
D-Glucitol	C00794	0.168254	0.176678	0.11058	0.134833	0.118644	0.134325	0.0141487	0.0141487	0.0141487	0.0141487	0.106947	0.142881	0.0949419	0.186707	0.130458	0.108526	0.120048	0.166365	0.197076	0.102098	0.158635	0.144336	0.0989125	0.136472
2-Aminoadipic acid	C00956	0.280822	0.173985	0.298605	0.282062	0.232633	0.222162	0.0141487	0.306811	0.219868	0.271101	0.231549	0.259399	0.202124	0.20567	0.346197	0.232584	0.26692	0.255231	0.0141487	0.0141487	0.222861	0.187908	0.235156	0.0141487
Trehalose	C01083	1.65684	1.35908	1.5033	1.51225	1.70861	1.35901	1.17267	1.15505	0.755913	0.95111	1.27839	1.19597	1.50086	0.776475	1.64741	1.17356	1.05213	1.34502	2.03476	0.874822	1.32627	1.23697	1.31749	1.38148
L-Hydroxyproline	C01157	0.176601	0.0141487	0.243028	0.175134	0.168182	0.148783	0.369701	0.2329	0.162634	0.17452	0.136845	0.254182	0.154017	0.19317	0.158493	0.183051	0.165789	0.176363	0.238234	0.130305	0.132917	0.16725	0.142116	0.156876
Stearic acid	C01530	0.328713	0.314315	0.381494	0.394793	0.324741	0.429227	0.625718	0.309702	0.328921	0.460896	0.505194	0.60854	0.424586	0.420973	0.382772	0.409252	0.328371	0.298746	0.454092	0.430377	0.35975	0.427487	0.317265	0.375871
9,12-Octadecadienoic acid	C01595	0.753623	0.464478	0.524147	0.710109	0.48103	0.539465	0.715151	0.478935	0.651728	0.873553	0.752908	0.634221	0.643659	1.1178	0.784773	1.10459	0.519338	0.7054	0.992341	0.933408	1.12702	0.610074	1.21105	0.75764
L-5-Oxoproline	C01879	1.09001	1.6162	2.42383	1.27878	1.7225	1.69898	1.05581	1.56711	1.61003	2.3137	1.58148	2.09473	1.7063	2.3676	1.93761	2.21686	2.41508	1.98001	1.21038	1.08416	2.19447	1.54771	1.46133	2.3737
Methylmaleic acid	C02226	1.00496	0.9332	0.970674	0.98896	0.904027	0.880608	1.11973	0.878982	0.83768	0.923778	0.911983	0.993507	0.858677	0.780889	0.878711	0.909239	0.793588	0.937996	0.652929	0.890856	0.80421	0.860589	0.819856	0.901862
Dodecanoic acid	C02679	0.332912	0.368903	0.282564	0.469523	0.306721	0.318685	0.343369	0.0141487	0.342324	0.360445	0.378567	0.361315	0.348435	0.35649	0.452491	0.345544	0.428662	0.228362	0.26636	0.450784	0.407832	0.35094	0.330639	0.301278
Acetyl-L-Lysine	C02727	0.212855	0.179703	0.241767	0.0141487	0.0141487	0.310167	0.376503	0.0141487	0.225687	0.352856	0.417425	0.440024	0.504764	0.0141487	0.48777	0.33833	0.0141487	0.0141487	0.363803	0.0141487	0.154	0.369873	0.0141487	0.318709
Methyl beta-D-galactoside	C03619	0.0141487	0.286502	0.268969	0.279147	0.250906	0.509222	0.699808	0.304342	0.54477	0.64734	0.565151	0.596659	0.30965	0.253319	0.567703	0.249038	0.253841	0.497336	0.343504	0.283343	0.230462	0.26214	0.544222	0.230189
N-Acetylglutamine	C04148	0.309378	0.518429	0.329134	0.47805	0.344995	0.342803	0.288963	0.443572	0.460022	0.644549	0.316147	0.496285	0.684399	0.266991	0.485155	0.696582	0.478404	0.396312	0.441172	0.0141487	0.230393	0.0141487	0.321491	0.246069
Myristic acid	C06424	0.178747	0.140094	0.305852	0.34998	0.202713	0.218875	0.0141487	0.240054	0.198514	0.295302	0.240221	0.26482	0.202972	0.19193	0.242988	0.244583	0.298858	0.208717	0.188749	0.171653	0.191685	0.263515	0.180977	0.26327
Eicosapentaenoic Acid	C06428	0.693052	0.254086	0.718947	0.684183	0.462845	0.547101	0.0141487	0.366268	0.693638	0.830034	0.944325	0.845783	0.664974	2.18975	1.35932	1.85847	0.522226	1.60451	0.506062	0.319113	0.480921	2.18253	0.340048	0.764907
Docosahexaenoic acid	C06429	1.02119	0.358657	0.994155	0.782353	0.562778	0.779623	0.708208	1.01581	1.13624	2.00712	1.27124	1.20473	0.851869	1.86054	1.07793	1.87418	0.697856	1.17322	0.78616	1.61472	0.313289	0.680894	0.376774	1.18104
DL-Ornithine	C07997	0.0141487	0.0141487	0.228606	0.0141487	0.0141487	0.0141487	0.0141487	0.0141487	0.347638	0.0141487	0.0141487	0.228719	0.33325	0.478168	0.245653	0.237762	0.36945	0.190207	0.0141487	0.0141487	0.228176	0.282054	0.0141487	0.325197
13-Docosenoic acid	C08316	0.274224	0.534789	0.209429	0.0141487	0.189129	0.191582	0.367529	0.255214	0.462986	0.349092	0.454308	0.30561	0.0141487	0.165206	0.436372	0.204742	0.205378	0.213458	0.316165	0.0141487	0.154793	0.150901	0.107406	0.165876
9-Hexadecenoic acid	C08362	1.78189	1.05996	1.31051	1.28031	1.30093	1.32809	2.17619	1.26457	1.23549	1.61234	1.2301	1.80389	1.49394	1.97103	1.51924	1.62753	1.58205	1.17289	1.85145	2.21235	1.83881	1.47631	1.97729	1.56639
Anthracene	C14315	7.42946	7.40861	7.55259	7.34208	7.64526	7.52283	7.67726	7.60335	7.42131	7.53388	7.61645	7.5526	7.60207	7.65295	7.60328	7.53338	7.64384	7.57447	7.49429	7.57462	7.47848	7.59134	7.59455	7.56775
11-Eicosenoic acid	C16526	1.12767	0.407904	0.708651	0.551461	0.41965	0.471328	0.895981	0.592489	0.728044	0.762397	0.74813	0.759442	1.0925	0.934654	1.10193	0.770889	0.524297	0.466215	0.91651	0.277933	0.894162	0.833667	0.340624	0.829359
d-Galactofuranose	C21066	0.540233	0.746672	0.94282	0.908985	0.42492	0.699397	0.339818	0.631104	0.986801	0.525231	0.631414	0.757524	0.679035	0.274074	0.631024	0.680987	0.547416	0.639505	0.0141487	0.0141487	0.140424	0.522202	0.230074	0.677034

## Sheet: LC-MS
Compound name	KEGG ID	CN_1	CN_2	CN_3	CN_4	CN_5	CN_6	KO_1	KO_2	KO_3	KO_4	KO_5	KO_6	PC_1	PC_2	PC_3	PC_4	PC_5	PC_6	KO+PC_1	KO+PC_2	KO+PC_3	KO+PC_4	KO+PC_5	KO+PC_6
NAD	C00003	0.180668	0.452529	2.14337	1.93974	1.03747	2.51912	1.02552	2.24761	3.42311	1.80973	2.69003	3.26573	1.16982	3.62291	2.5592	1.14406	2.54788	2.88771	0.15222	0.761512	3.50636	3.88669	1.08269	0.7476
Uridine 5'-diphosphate	C00015	0.00151056	0.0496114	0.216739	0.00151056	0.0443822	0.0900324	0.148658	0.107258	0.179717	0.105609	0.274464	0.2127	0.32279	0.253459	0.127749	0.115145	0.149478	0.243801	0.174744	0.0685395	0.257257	0.113808	0.0731262	0.251504
FAD	C00016	0.406147	0.145852	0.53284	0.786178	0.714395	0.407974	0.26186	0.729071	0.440152	0.620885	0.283671	0.367533	1.18456	0.0719202	0.542658	0.523379	0.291292	0.354036	0.00713899	0.135523	0.298421	0.666494	0.00713899	0.974421
S-Adenosylmethionine	C00019	0.00151056	0.00151056	0.481892	0.00151056	0.00151056	0.00151056	0.00151056	0.801402	0.00151056	1.14008	2.46109	0.00151056	0.00151056	0.00151056	1.24097	0.00151056	0.00151056	3.4934	0.00151056	0.23323	1.99991	0.00151056	2.92637	3.69481
Adenosine monophosphate	C00020	3.15266	0.866721	1.5767	4.32953	0.533226	1.51941	2.53214	1.35989	4.8579	3.52278	3.20579	2.05286	7.60533	5.12244	0.19636	3.03301	1.49308	1.64547	3.92477	3.69135	0.119636	0.85756	0.291075	2.26952
Acetyl-CoA	C00024	0.00151056	0.00151056	0.127599	0.0852801	0.00151056	0.358201	0.00151056	0.102735	0.121708	0.0725173	0.164641	0.404418	0.00151056	0.00151056	0.270698	0.00151056	0.159289	0.230669	0.00151056	0.104423	0.225568	0.00151056	0.00151056	0.977475
L-Glutamic acid	C00025	0.415836	0.214873	0.432643	0.73421	0.135614	0.799989	0.320953	0.708098	1.18789	1.08008	0.70294	0.98264	1.11873	1.59741	0.813722	1.30277	0.621532	1.12282	0.448317	0.116902	0.863948	0.336935	1.10313	0.00713899
Uridine diphosphate glucose	C00029	0.151263	0.146374	0.488052	0.167043	0.117583	0.176765	0.283007	0.25101	0.378042	0.240045	0.515736	0.463181	0.0850751	0.480209	0.312128	0.269091	0.299594	0.465897	0.400106	0.161129	0.183753	0.29877	0.157962	0.592641
Guanosine diphosphate	C00035	0.137602	0.00151056	0.00151056	0.00151056	0.00151056	0.00151056	0.00151056	0.853484	0.890646	0.00151056	1.63296	0.00151056	0.00151056	0.447612	1.08189	0.00151056	0.68235	0.794456	0.00151056	0.00151056	0.492421	0.00151056	0.00151056	0.00151056
L-Alanine	C00041	0.00713899	1.2009	2.39454	1.66142	1.03817	1.74607	1.15572	0.00713899	2.12338	2.31287	2.43599	2.77018	2.24449	0.00713899	1.99976	3.01904	1.37987	2.15546	1.44067	0.00713899	0.918309	2.53651	0.386844	2.41068
Uridine diphosphate-N-acetylglucosamine	C00043	0.509866	0.551021	1.75289	0.880335	0.681719	1.17674	0.882738	0.980566	1.33217	1.18509	1.37021	1.90975	1.10671	0.413427	1.83004	1.32885	1.1039	1.54774	0.561148	0.67991	1.57099	1.55145	0.503884	2.53895
Glutathione	C00051	0.00713899	0.389358	0.00713899	0.00713899	0.440767	0.618901	0.00713899	0.845375	0.00713899	0.60951	0.00713899	0.00713899	0.00713899	0.202808	1.06062	0.00713899	1.15929	0.751051	0.00713899	0.619015	0.436495	0.00713899	0.276682	0.962723
Uridine diphosphategalactose	C00052	0.452776	0.533167	1.28342	0.851539	0.67693	1.63449	0.832978	0.978445	1.90068	1.04789	1.20662	1.52571	0.936279	0.510753	1.74023	1.03414	1.40204	1.28213	0.966498	0.728037	1.91336	1.24664	0.623762	1.68985
Adenosine 3',5'-diphosphate	C00054	0.00151056	0.00151056	1.38951	0.732471	0.465344	1.05961	0.00151056	0.00151056	0.851051	0.82152	0.647534	1.12104	0.1002	0.0845787	1.87125	0.529734	0.873325	1.58027	0.00151056	0.339473	1.2699	0.608349	0.474821	2.1882
Cytidine monophosphate	C00055	0.219932	0.00151056	0.00151056	0.181543	0.00151056	0.0503875	0.099559	0.120938	0.23915	0.347565	0.0715868	0.10213	0.00151056	0.354477	0.136122	0.516447	0.00151056	0.00151056	0.372735	0.00151056	0.193897	0.00151056	0.00151056	0.0532122
L-Arginine	C00062	0.00178719	0.00178719	0.00178719	0.00178719	0.00178719	0.00178719	0.00178719	0.00178719	0.00178719	0.00178719	0.00178719	0.0808966	0.101661	0.00178719	0.0765962	0.0824774	0.00178719	0.178896	0.00178719	0.00178719	0.00178719	0.184438	0.00178719	0.225881
L-Serine	C00065	1.80804	1.42101	4.21312	3.16226	1.62093	3.76488	0.00151056	0.00151056	2.26463	0.00151056	3.03571	0.00151056	0.00151056	1.14081	0.00151056	0.00151056	0.00151056	0.00151056	3.63888	1.20376	0.00151056	0.00151056	1.06504	0.00151056
L-Methionine	C00073	0.586504	0.532724	0.801584	0.406704	0.322735	0.70407	0.863782	0.600824	1.3056	0.611255	0.914821	1.0891	1.08881	0.218179	0.652823	1.19704	0.701187	0.756551	0.48329	0.316516	1.78021	1.00372	0.352316	1.06957
Phosphoenolpyruvic acid	C00074	0.397855	0.171595	0.667162	0.240709	0.262507	0.537853	0.280775	0.277505	0.284999	0.655387	0.404558	0.688862	0.863446	0.969206	0.497605	0.805707	0.469783	0.851511	0.613554	0.668997	0.634624	0.167411	0.487299	0.182102
L-Tryptophan	C00078	0.00713899	0.190682	0.460375	0.336013	0.0559997	0.141857	0.00713899	0.0987136	0.482947	0.570685	0.170536	0.378917	0.00713899	0.00713899	0.478237	0.98372	0.17224	0.57524	0.00713899	0.766877	0.00713899	0.00713899	0.117282	0.720255
L-Phenylalanine	C00079	0.0791205	0.163915	0.308122	0.823103	0.0575782	0.444918	1.3107	1.02372	1.29074	1.48885	0.635793	1.04993	0.493044	1.4702	0.00713899	0.987135	0.281371	1.0688	0.249975	0.71818	0.00713899	1.56241	0.279909	0.0923088
L-Tyrosine	C00082	1.03361	1.94151	2.12803	3.58051	1.07189	1.31149	1.95313	2.42804	2.73162	3.69845	3.19148	2.9326	1.99721	0.302961	2.78567	5.20051	2.5453	3.86799	1.34616	1.00724	0.963855	5.31666	2.02536	4.96345
Fructose 6-phosphate	C00085	0.00713899	0.00713899	0.27604	0.159299	0.00713899	0.167991	0.00713899	0.00713899	0.236924	0.356239	0.254086	0.293602	0.580484	0.00713899	0.00713899	0.464156	0.00713899	0.498287	0.371694	0.374562	0.00713899	0.334604	0.136571	0.44063
Glucose 6-phosphate	C00092	0.504363	0.562887	0.457051	1.19951	0.428774	0.562684	0.440598	0.586656	0.367491	0.7627	0.120571	1.49192	1.10014	0.1378	0.687705	0.491578	1.17613	1.91846	1.11427	0.39539	1.68834	0.107963	0.23143	1.06852
Glycerol 3-phosphate	C00093	0.184664	0.706545	0.457905	0.628056	0.407576	0.759777	0.365451	0.820755	0.580122	0.348787	1.03022	0.975586	0.00151056	0.0847185	0.956001	0.52108	0.543168	0.887437	0.465182	0.276251	1.16575	0.538222	0.353317	0.528455
Guanosine diphosphate mannose	C00096	0.00151056	0.21427	0.641263	0.376068	0.192119	0.463217	0.311664	0.420531	0.663264	0.396447	0.445423	0.576514	0.215276	0.797001	0.584317	0.341595	0.518466	0.655238	0.0891403	0.18981	0.541279	0.364659	0.227352	0.704127
Glucose 1-phosphate	C00103	0.591879	0.29779	0.469279	0.111741	0.176905	0.175109	0.81155	0.429241	0.340924	0.250956	0.661882	0.445007	0.635031	0.739323	0.450307	0.281557	0.334057	0.535581	0.584349	0.301299	0.858775	0.327746	0.287852	0.46512
Uridine 5'-monophosphate	C00105	0.206949	0.116279	0.130659	0.323739	0.389648	0.271446	0.00151056	0.136066	0.326551	0.700459	0.316218	0.254136	0.713304	0.00151056	0.580455	0.289269	0.308091	0.0986324	0.00151056	0.63321	0.319717	0.949629	0.00151056	0.374581
L-Leucine	C00123	0.317059	0.309979	0.326024	0.345626	0.299653	0.335238	0.00151056	0.00151056	0.425088	0.380726	0.00151056	0.282953	0.263182	0.00151056	0.391099	0.637165	0.240475	0.480078	0.00151056	0.00151056	0.459765	0.514983	0.743083	0.216738
Inosinic acid	C00130	0.524037	0.00713899	0.614687	0.451738	0.217443	0.205925	0.893096	0.889178	0.503854	0.723943	1.03534	0.907804	0.682483	0.00713899	0.485905	3.03936	0.430746	0.585063	0.450012	0.00713899	0.806359	0.317753	0.00713899	0.577913
L-Histidine	C00135	0.00151056	0.00151056	0.167964	0.109678	0.0916093	0.39644	0.00151056	0.00151056	0.00151056	0.354023	9.21667	0.502328	0.00151056	0.00151056	0.767357	14.4128	0.156986	15.5902	0.00151056	0.00151056	0.106822	9.95677	0.00151056	12.0276
N-Acetyl-D-glucosamine	C00140	0.00151056	0.00151056	0.066734	0.276331	0.00151056	0.00151056	0.00151056	0.00151056	0.0794692	0.00151056	0.203041	0.163621	0.277695	0.00151056	0.422561	0.951473	0.0868577	0.21373	0.141532	0.00151056	0.396945	0.561686	0.00151056	0.198174
Guanosine monophosphate	C00144	0.428915	0.110869	0.259928	0.596197	0.564524	0.189484	0.177084	0.212217	0.576679	0.387709	0.460043	0.478725	1.14626	0.715437	0.00713899	0.285035	0.198118	0.24414	0.678385	0.554673	0.00713899	0.00713899	0.00713899	0.275827
Adenine	C00147	0.834221	1.34652	1.38471	2.50722	0.569086	1.65125	1.32834	1.55298	2.2024	1.74817	1.88372	1.93665	2.43632	1.81083	2.11224	1.6902	1.19324	1.17291	2.047	2.62158	2.52298	1.60025	0.562892	1.92869
L-Malic acid	C00149	0.00151056	0.00151056	0.00151056	0.00151056	0.00151056	0.00151056	0.00151056	0.00151056	0.209267	0.145712	0.00151056	0.0699435	0.00151056	0.00151056	0.236955	0.0636835	0.0500339	0.243279	0.00151056	0.00151056	0.236427	0.140288	0.00151056	0.228751
Citric acid	C00158	0.00178719	0.00178719	0.149432	0.00178719	0.00178719	0.00178719	0.35595	0.164017	0.35474	0.556448	0.2501	0.30487	0.440401	0.00178719	0.00178719	0.206227	0.00178719	0.323718	0.00178719	0.364823	0.00178719	0.00178719	0.00178719	0.419408
Uridine diphosphate glucuronic acid	C00167	0.46041	0.431717	1.00804	1.25351	0.286845	1.60912	0.613947	0.693766	0.954422	1.33677	1.8333	2.51242	1.73468	2.99705	2.11393	1.73294	1.68957	2.84972	1.32558	0.406046	1.56728	0.761652	1.16953	1.60056
5'-Methylthioadenosine	C00170	3.74856	3.14505	3.58603	4.0018	5.23481	5.00088	0.0136907	4.21322	6.84182	7.36443	6.46529	4.96166	9.23051	4.24153	8.07897	5.92345	7.4516	6.5062	12.9554	12.6657	10.0376	7.24942	5.19036	5.74389
1-beta-D-Glucopyranosyl-4-D-glucopyranose	C00185	0.403619	0.605324	0.63393	0.798	0.00151056	0.455249	0.00151056	0.00151056	0.00151056	0.00151056	0.183626	0.192997	0.00151056	0.00151056	0.00151056	0.258575	0.484463	0.417115	0.00151056	0.00151056	0.315904	0.00151056	0.00151056	0.00151056
L-Threonine	C00188	0.00151056	0.336656	0.00151056	0.00151056	0.00151056	0.370779	0.323071	0.711429	0.744585	0.725084	0.834406	0.757082	0.610806	0.00151056	0.00151056	0.00151056	0.35793	0.34183	0.00151056	0.00151056	0.00151056	0.00151056	0.00151056	0.00151056
D-Maltose	C00208	1.65261	1.17643	1.51627	0.89181	1.17318	1.70858	2.24152	1.4761	2.00453	1.27151	1.34867	2.17014	2.01918	0.647376	2.52668	2.0129	1.06247	1.6375	1.14469	3.39724	4.27351	1.30559	1.2669	3.51537
Arachidonic acid	C00219	0.134412	0.0887984	0.344229	0.334062	0.00178719	0.00178719	0.33372	0.213268	0.442858	0.352889	0.348695	0.294074	0.580746	0.00178719	0.485843	0.394056	0.00178719	0.175748	0.387431	0.485108	0.582381	0.377369	0.00178719	0.279814
Acetylphosphate	C00227	35.1739	50.7686	52.145	70.2445	68.0747	34.4643	50.1136	45.2549	38.5937	62.3984	40.1864	53.1501	47.024	50.7628	51.2931	54.7687	49.0124	65.2695	56.9404	44.2709	37.0289	49.6793	31.1984	66.4089
10-Formyltetrahydrofolate	C00234	1.78521	0.694051	6.18265	1.79261	0.317794	0.00151056	2.2385	1.21507	1.11336	3.76614	4.09893	2.9093	0.205192	14.5962	3.03102	7.89393	0.156901	4.90197	1.90333	0.296348	1.01057	6.8671	0.511982	2.38351
Dimethylallylpyrophosphate	C00235	0.984445	0.913966	1.04729	1.0284	0.959729	0.915199	0.97913	1.12308	1.09797	1.23411	1.20327	1.312	0.913945	1.01228	1.02838	1.10332	1.08403	0.926172	1.065	1.06679	1.11573	1.21461	0.965867	0.966278
Guanine	C00242	0.192751	0.194526	0.53786	1.16708	0.35481	1.25164	0.811318	0.529608	1.21445	0.625442	0.854662	1.92244	0.237719	0.463327	1.71476	0.583024	0.716129	1.74846	0.269908	0.395521	1.30285	1.75718	0.822765	0.472759
Palmitic acid	C00249	1.32331	1.00344	1.112	1.29209	1.46081	0.95691	0.864306	0.954385	0.857276	0.0136907	0.0136907	0.913374	1.12658	1.39347	1.21944	0.907253	1.22644	1.35386	0.811257	0.82337	0.811251	0.859282	1.19916	1.27689
Isomaltose	C00252	1.11724	0.547712	0.998911	0.160188	0.36761	0.313028	0.654756	0.633171	0.264454	0.520027	0.717448	0.769652	1.0044	0.182443	0.925986	0.612942	0.859935	1.41361	1.3078	0.373413	0.56056	0.700687	0.103362	1.46241
Riboflavin	C00255	1.4938	0.81413	1.85247	0.529608	0.0569531	0.0455295	2.14173	1.61922	0.105206	0.126053	0.127105	0.224204	0.726558	3.12191	0.076413	0.218721	0.218335	0.188214	1.04102	2.97476	0.00151056	0.178173	0.174025	0.240156
Hypoxanthine	C00262	0.0484844	0.159955	0.548983	0.600071	0.00151056	0.441355	0.221277	0.485644	0.446325	0.99721	0.44809	0.60055	0.00151056	0.701452	0.332413	0.899733	0.249256	0.370564	0.818432	0.478069	0.600388	0.94218	0.00151056	0.659747
L-Homoserine	C00263	0.35147	0.238081	0.387804	0.522459	0.190405	0.559641	0.356008	0.504602	0.81131	0.613188	0.449052	0.706752	0.613921	0.801866	0.602838	0.617196	0.419149	0.612321	0.403678	0.217525	0.535871	0.62488	0.195547	0.706089
Alpha-D-Glucose	C00267	1.94062	1.15996	1.32614	2.26062	0.8935	0.385237	2.29316	1.39209	1.54665	0.603523	2.73579	1.68362	3.10549	2.92506	0.706575	1.87615	1.88898	1.797	3.46613	2.55524	3.54915	3.89087	1.19751	1.64193
Mannose 6-phosphate	C00275	0.00151056	0.00151056	0.00151056	0.00151056	0.0995587	0.00151056	0.00151056	0.0525254	0.00151056	0.171671	0.00151056	0.194208	0.095851	0.00151056	0.26172	0.228385	0.00151056	0.242035	0.00151056	0.00151056	0.243072	0.00151056	0.00151056	0.129744
Aniline	C00292	0.0817087	0.095227	0.180322	0.00151056	0.073172	0.179308	0.213684	0.231672	0.287638	0.287341	0.490783	0.380319	0.00151056	0.497576	0.157552	0.3401	0.15008	0.227428	0.232217	0.269243	0.20561	0.327803	0.0829567	0.291502
Inosine	C00294	1.18855	0.504572	0.701723	0.646918	1.17538	0.793681	0.903771	1.21863	0.761948	0.86939	0.792325	1.05463	2.18625	1.35006	0.140366	1.17348	0.179746	0.725948	1.06906	0.130387	1.10748	1.80592	0.00713899	0.986465
Adenosine diphosphate ribose	C00301	0.00713899	0.00713899	0.00713899	0.37781	0.00713899	0.39608	0.00713899	0.343839	0.00713899	0.33815	0.263479	0.312955	0.386481	0.221602	0.00713899	0.205435	0.660219	0.00713899	0.00713899	0.499014	0.00713899	0.00713899	0.152254	0.00713899
Citicoline	C00307	0.00713899	0.135117	0.496357	0.582773	0.149999	0.252846	0.00713899	0.252959	0.677263	0.672778	0.845854	0.515114	0.662337	0.069357	0.874219	0.755221	0.545845	0.71961	0.243915	0.134509	0.197956	0.714464	0.218281	0.902621
L-Carnitine	C00318	0.44303	0.250814	0.810967	1.78828	0.230351	1.57684	1.89012	1.69664	2.51925	1.86385	1.22022	1.741	1.47454	1.69304	1.30431	1.75521	0.966789	1.40391	1.43292	0.399348	1.46356	1.76864	1.57203	2.11406
Sphingosine	C00319	0.0136907	1.1136	1.20614	0.746871	0.0136907	0.0136907	1.66675	1.92136	1.50881	1.69117	0.0136907	1.25652	1.42441	1.37483	1.33847	0.825436	0.0136907	0.962753	0.869293	1.80893	1.40816	1.00245	1.02423	1.14615
GDP-L-fucose	C00325	0.00713899	0.0966396	0.332828	0.13039	0.140338	0.00713899	0.00713899	0.149963	0.00713899	0.00713899	0.00713899	0.18529	0.00713899	0.00713899	0.00713899	0.13666	0.210879	0.194387	0.00713899	0.00713899	0.00713899	0.16186	0.20944	0.00713899
Citrulline	C00327	1.25882	1.1187	2.73283	0.634115	0.842787	1.68436	1.17048	2.40641	2.86189	6.51795	1.86476	2.63465	0.579125	2.18857	0.87962	4.76014	1.04099	0.915295	3.55846	0.454088	1.81893	1.8829	0.413977	0.610569
Deoxyguanosine	C00330	0.561535	0.00713899	0.00713899	0.38688	0.00713899	0.519655	0.00713899	0.00713899	0.372477	0.298091	0.392013	0.378633	0.465004	0.54928	0.00713899	0.50254	0.243932	0.387805	0.328094	0.440651	0.00713899	0.268588	0.415812	0.00713899
N-Acetyl-D-Glucosamine 6-Phosphate	C00357	0.00713899	0.00713899	0.32717	0.428616	0.00713899	0.00713899	0.594997	0.185292	0.562957	0.695454	0.38879	0.623595	0.00713899	0.542945	0.00713899	0.201903	0.00713899	0.121041	0.227774	0.00713899	0.941217	0.00713899	0.00713899	0.113505
2'-Deoxyguanosine 5'-monophosphate	C00362	0.00151056	0.00151056	0.143261	0.00151056	0.00151056	0.00151056	0.772754	0.00151056	0.169298	0.00151056	0.00151056	0.145687	0.928344	0.00151056	0.318526	0.288525	0.120821	0.00151056	0.603669	0.00151056	0.0850014	0.245527	0.00151056	0.250307
Uric acid	C00366	0.322144	0.00713899	2.67296	2.82879	0.00713899	2.46813	4.6617	1.6372	2.7059	5.14406	2.38406	4.47952	1.13708	2.76173	0.159197	2.93412	2.58126	1.15843	0.238103	0.846061	0.395825	0.433673	2.36845	0.290562
Cytosine	C00380	0.00151056	0.00151056	0.507129	0.87683	0.00151056	0.562583	0.148166	0.46618	0.00151056	0.848094	0.291764	0.531522	0.00151056	0.00151056	0.00151056	0.530827	0.286828	0.00151056	0.00151056	0.00151056	0.00151056	0.00151056	0.00151056	0.00151056
Xanthine	C00385	1.16387	0.184683	0.436155	0.986343	0.215195	1.12777	1.91628	0.536295	2.5056	1.25447	0.891242	1.63643	1.72285	0.132646	2.35019	0.967895	0.685724	1.08155	0.898642	0.0852481	1.41419	2.11062	0.251105	1.72467
Guanosine	C00387	0.00713899	0.00713899	0.147879	0.279245	0.00713899	0.130202	0.305118	0.479103	0.344568	0.165047	0.370017	0.525838	0.00713899	0.17673	0.727005	0.297654	0.210341	0.634864	0.00713899	0.152639	0.388293	0.197475	0.111969	0.506396
D-Aspartic acid	C00402	1.06595	0.470147	1.23681	2.94761	0.273009	1.11456	1.25762	1.18285	2.46933	2.61918	1.03554	1.99232	3.47539	1.1878	1.53498	0.775587	0.914235	2.15461	1.19301	0.85524	1.45482	1.07683	0.255753	1.71912
L-Isoleucine	C00407	0.358815	0.227319	0.240103	0.216196	0.269991	0.214681	0.00178719	0.00178719	0.235067	0.00178719	0.279513	0.353505	0.00178719	0.464434	0.196104	0.46384	0.196879	0.367798	0.462252	0.385355	0.171779	0.471435	0.18874	0.536281
5-Aminopentanoic acid	C00431	2.06391	2.1749	2.60088	2.96765	1.75842	2.44738	0.811216	2.40452	2.56071	3.73799	2.73722	4.29961	1.28805	0.19763	2.5089	4.38116	1.88124	4.53484	0.673922	0.475795	4.02677	1.02521	4.53614	1.48904
Formiminoglutamic acid	C00439	0.15806	0.00151056	0.00151056	0.783475	0.127183	0.00151056	0.00151056	0.00151056	0.682996	1.63308	0.481739	0.87197	0.00151056	0.221995	0.460472	0.00151056	0.00151056	0.00151056	0.711971	0.00151056	0.00151056	0.583301	0.0462227	0.883637
Saccharopine	C00449	0.00151056	0.118506	0.258929	0.104443	0.00151056	0.0514195	0.227874	0.197341	0.349778	0.238564	0.220316	0.216662	0.265468	0.00151056	0.180261	0.25114	0.0904529	0.14198	0.126501	0.0712257	0.00151056	0.268381	0.00151056	0.240693
Nicotinamide ribotide	C00455	0.00151056	0.00151056	0.00151056	0.00151056	0.00151056	0.00151056	0.00151056	0.00151056	0.510857	0.966767	0.00151056	0.575018	0.958857	0.00151056	0.00151056	0.18195	0.0640344	0.38991	0.406118	0.00151056	0.00151056	0.00151056	0.00151056	0.324633
Cytidine	C00475	0.148636	0.00151056	0.00151056	0.337975	0.00151056	0.417822	0.00151056	0.00151056	0.311474	0.219107	0.153472	0.207396	0.36471	0.00151056	0.317054	0.314358	0.175682	0.109952	0.203099	0.00151056	0.00151056	0.335115	0.00151056	0.415636
Tyramine	C00483	0.00151056	0.123649	0.191832	0.445402	0.0600535	0.23619	0.00151056	0.00151056	0.538282	0.486457	0.31979	0.508631	0.387131	0.00151056	0.593482	0.974825	0.00151056	0.567193	0.00151056	0.00151056	0.741807	0.574645	0.0600318	0.948799
ADP-glucose	C00498	0.00713899	0.197379	0.329836	0.00713899	0.114622	0.180732	0.00713899	0.205961	0.606199	1.06652	0.398233	0.610412	0.345021	0.00713899	1.42716	1.66892	0.303488	0.928935	0.00713899	0.123535	0.323897	1.61735	0.00713899	1.39654
Allantoic acid	C00499	0.218862	0.00151056	0.00151056	0.0988797	0.00151056	0.00151056	0.123496	0.229823	0.37091	0.0948661	0.246755	0.258204	0.00151056	0.00151056	0.00151056	0.176003	0.00151056	0.00151056	0.00151056	0.00151056	0.00151056	0.00151056	0.143971	0.00151056
CDP-glycerol	C00513	0.00151056	0.00151056	0.00151056	0.170536	0.0639717	0.542039	0.00151056	0.00151056	0.683008	0.150586	0.676631	0.427892	0.0840344	0.00151056	0.129395	0.468475	0.1417	0.723061	0.00151056	0.00151056	0.660857	0.195911	0.564102	0.0512997
Palmitaldehyde	C00517	3.65264	5.32174	5.33134	6.21932	9.17897	6.57501	9.31893	7.09055	6.50632	9.71526	8.37342	7.95009	4.66842	5.77112	6.43177	6.74829	6.37032	6.8959	8.64226	5.4631	5.25871	8.99945	6.56462	7.12662
SM(d18:1/18:0)	C00550	2.08663	2.13413	2.65185	1.81494	2.45905	2.97377	3.04863	2.95868	2.30141	2.30313	1.99792	2.02119	3.08771	4.30422	2.73242	5.06414	2.57005	5.16488	3.02124	3.43873	2.23702	4.1168	4.24916	2.12404
p-Aminobenzoic acid	C00568	101.845	101.691	99.3572	102.438	102.397	100.265	103.627	96.8788	100.226	94.3342	105.974	95.9456	103.626	104.705	95.4861	102.469	104.441	106.326	103.167	101.56	104.336	106.436	95.2381	96.5518
CDP-Ethanolamine	C00570	0.66944	0.452131	1.21256	1.13443	0.62606	0.747008	1.27627	0.85722	1.20281	1.40903	1.58334	1.39187	0.277271	2.01976	1.43561	1.37618	1.10559	1.14047	1.65568	1.90778	1.46051	1.52575	0.684092	1.56995
Phosphorylcholine	C00588	0.836644	0.470516	1.05703	1.0345	0.38759	0.647746	0.783018	0.853071	1.48549	1.34747	1.73342	1.11067	3.11435	0.297801	1.66648	1.7127	0.816013	1.41671	2.23042	0.388427	0.54117	1.73599	0.341692	1.63183
D-Mannose 1-phosphate	C00636	0.0858533	0.154197	0.139613	0.385432	0.0981382	0.175707	0.00151056	0.139021	0.0997655	0.208325	0.00151056	0.318579	0.312933	0.525078	0.189815	0.125239	0.34609	0.494326	0.299676	0.0988612	0.455159	0.00151056	0.00151056	0.242372
Oleic acid	C00712	4.43101	3.0686	2.85739	5.30291	2.08883	4.08185	10.2747	3.44932	6.1552	4.99623	5.20174	4.70977	3.66925	1.98738	8.44018	6.36613	3.37902	4.72291	3.60977	3.98615	9.85224	6.77732	10.4044	3.44956
Betaine	C00719	2.1709	0.882544	1.83866	2.45443	0.83252	1.6611	1.98068	3.04563	3.38169	3.25456	2.70997	2.70218	1.47123	1.12275	2.88281	1.21453	2.33901	1.78187	2.27019	1.16926	3.87454	1.45118	0.97368	2.17958
Squalene	C00751	0.00178719	0.00178719	0.13059	0.202873	0.00178719	0.145145	0.233759	0.334452	0.308937	0.232176	0.194047	0.306654	0.3087	0.104238	0.302224	0.27023	0.113064	0.26532	0.00178719	0.248901	0.00178719	0.183843	0.00178719	0.266033
D-Proline	C00763	0.351244	0.176075	0.405831	0.925894	0.227426	0.712005	0.7836	0.296145	1.07228	1.03443	0.569621	0.954366	0.564269	0.158966	1.39834	1.21893	0.425549	0.76301	0.351528	1.13812	1.33054	1.45889	0.176561	1.14206
Urocanic acid	C00785	0.00151056	0.00151056	0.00151056	0.00151056	0.00151056	0.00151056	0.00151056	0.00151056	1.88615	4.47723	2.23259	3.70382	0.00151056	0.00151056	1.32998	0.00151056	0.738945	0.00151056	0.00151056	0.00151056	0.730053	0.00151056	0.401206	0.00151056
L-Arogenate	C00826	0.129004	0.15843	0.164579	0.152682	0.285623	0.128321	0.275264	0.0854588	0.00151056	0.236949	0.145911	0.237956	0.217353	0.224024	0.106677	0.25775	0.213551	0.15247	0.00151056	0.150882	0.00151056	0.287292	0.152501	0.210832
Sphinganine	C00836	3.62781	3.20274	3.35949	4.04762	4.08005	3.12195	4.00103	4.60008	3.91703	3.62477	3.20267	3.4962	3.13971	3.40997	3.55894	4.63431	3.68217	4.06483	3.86565	3.14918	3.53992	3.44461	3.3305	3.72658
Pantothenic acid	C00864	0.00713899	0.29495	0.399236	0.00713899	0.00713899	0.00713899	0.942399	0.75743	1.01095	0.828919	0.662754	0.758415	0.00713899	0.125533	0.00713899	0.00713899	0.00713899	0.635558	0.00713899	0.00713899	0.00713899	0.00713899	0.00713899	0.00713899
Indoleacetic acid	C00954	0.00151056	0.00151056	0.00151056	0.00151056	0.00151056	0.00151056	0.00151056	0.00151056	0.0888958	0.0785739	0.186087	0.16443	0.00151056	0.00151056	0.00151056	0.00151056	0.128349	0.00151056	0.556488	0.00151056	0.00151056	0.00151056	0.00151056	0.00151056
Aminoadipic acid	C00956	0.20459	0.257732	0.0786213	0.00151056	0.109317	0.102078	0.00151056	0.00151056	0.00151056	0.00151056	0.132884	0.177705	0.11517	0.108817	0.0547704	0.0545487	0.100815	0.090145	0.00151056	0.267558	0.00151056	0.00151056	0.096924	0.0898061
Formylmethanofuran	C01001	0.42161	0.101279	0.424236	0.00151056	0.00151056	0.00151056	0.214109	1.01362	1.19457	0.733286	0.999593	0.578154	0.00151056	1.81795	1.06663	0.675018	0.182012	0.447299	0.00151056	1.70182	0.489747	0.713394	0.0861447	0.698591
Phosphoserine	C01005	1.42745	0.866559	1.65522	2.09398	0.668177	2.8009	1.58392	2.03322	3.81577	3.27125	2.41174	3.61192	3.12816	4.62789	2.73211	4.31316	2.48487	3.3691	1.84191	0.636885	2.82854	1.25957	3.2389	0.447445
Dimethylglycine	C01026	0.00151056	0.00151056	0.209679	0.0660211	0.12089	0.0516668	0.00151056	0.00151056	0.00151056	0.00151056	0.00151056	0.00151056	0.00151056	0.00151056	0.00151056	0.00151056	0.071984	0.00151056	0.00151056	0.00151056	0.00151056	0.00151056	0.00151056	0.00151056
4-Guanidinobutanoic acid	C01035	0.00151056	0.0969388	0.291913	0.198509	0.173263	0.253499	0.00151056	0.181934	0.237908	0.216249	0.241012	0.291586	0.166628	0.0855212	0.30009	0.176716	0.250088	0.340273	0.148995	0.375582	0.301457	0.208771	0.16005	0.368381
Sorbitol-6-phosphate	C01096	10.2237	10.3748	9.69228	9.82286	10.3555	9.47452	10.8371	9.87335	9.30086	9.97052	8.94981	9.07604	9.96227	10.1277	9.01109	9.84959	9.45788	10.0356	10.5193	8.94722	9.39457	8.46924	9.99989	9.28613
7-Dehydrocholesterol	C01164	1.29475	0.439396	0.805271	1.24213	0.0136907	0.78302	2.0854	3.24195	3.46971	2.09291	2.72569	1.69397	3.27953	2.96487	2.99977	2.31347	3.31633	1.19131	3.28687	3.86665	4.51945	2.03925	3.48428	4.28788
Pseudouridine 5'-phosphate	C01168	1.6324	0.00713899	2.31915	1.33314	0.00713899	0.00713899	1.04621	1.46058	2.85354	2.10743	2.75495	2.53877	2.1855	0.00713899	1.61039	2.67698	0.00713899	2.32821	1.5778	0.00713899	0.00713899	0.00713899	0.00713899	2.48172
Glycerylphosphorylethanolamine	C01233	1.19656	0.516382	1.20242	0.971824	0.519337	0.924958	2.53514	1.27913	2.32155	1.6422	2.10162	2.12367	2.83998	2.48544	1.66871	1.55595	0.770382	1.64121	1.92823	1.80007	2.07745	1.77815	0.604277	2.49043
Beta-Cortol	C01235	10.4487	5.22807	8.67485	3.08922	3.87911	3.95235	6.51604	5.51546	3.32108	5.50894	5.59319	7.67201	11.4962	1.86928	8.55369	6.9338	7.65131	11.3858	12.7865	3.28767	5.99087	7.08909	2.25393	12.5201
6-Phosphonoglucono-D-lactone	C01236	10.2583	10.5034	9.89788	10.2221	10.6722	9.79902	10.9947	10.092	9.35184	10.139	9.56447	8.95651	9.87308	10.3657	9.1973	10.3377	9.66147	10.0408	10.514	9.20032	9.63268	8.62899	10.1818	9.63546
dUDP	C01346	0.00713899	0.153487	0.45242	0.594035	0.192716	0.235437	0.00713899	0.258883	0.70967	0.666334	0.790776	0.801476	0.674401	0.00713899	0.885386	0.699056	0.490857	0.78334	0.267469	0.141776	0.174823	0.707949	0.199804	1.13885
3'-AMP	C01367	0.211739	0.0261668	0.116499	0.134012	0.00151056	0.071441	0.00151056	0.106548	0.158411	0.318773	0.262712	0.252922	0.00151056	0.328612	0.18681	0.392772	0.0669035	0.157981	0.206018	0.00151056	0.340239	0.212598	0.00151056	0.262501
Stearic acid	C01530	6.79076	7.80021	10.6486	9.78446	8.13092	10.2385	7.98767	7.36894	6.63904	9.70195	9.48613	7.71689	5.51471	7.80247	6.98645	8.43207	7.32484	5.94726	8.00757	7.65281	6.99364	8.51805	8.55515	8.43388
Allantoin	C01551	0.600511	0.409977	0.750206	0.635791	0.304082	0.581905	0.807177	0.730907	0.780377	0.882677	0.862607	1.11978	0.197101	1.34597	0.559327	1.11372	0.529569	0.759534	1.01602	0.766751	0.77396	0.986632	0.335032	0.884983
Calcidiol	C01561	0.0136907	0.0136907	0.0136907	1.82223	0.0136907	1.03758	3.13555	1.45519	2.05059	1.98148	3.29902	1.42863	1.1291	1.16482	1.6542	2.2539	1.90539	1.65119	0.0136907	0.95793	0.0136907	1.30511	0.0136907	1.18531
Capric acid	C01571	0.174973	0.00178719	0.24421	0.00178719	0.152808	0.00178719	0.268877	0.00178719	0.216876	0.167081	0.128273	0.181976	0.189138	0.294815	0.129278	0.243654	0.12659	0.213874	0.128247	0.154357	0.211202	0.290815	0.189075	0.112322
Linoleic acid	C01595	0.127229	0.124293	0.00178719	0.211327	0.118618	0.164955	0.187903	0.149917	0.132855	0.213352	0.164225	0.00178719	0.126267	0.284079	0.203386	0.153582	0.140948	0.190195	0.119385	0.0487614	0.157626	0.150876	0.113263	0.129156
Pelargonic acid	C01601	0.521476	0.465427	0.670589	0.480143	0.40648	0.386588	0.687895	0.485253	0.49961	0.50232	0.486348	0.396984	0.549306	0.506196	0.536514	0.427803	0.540627	0.29723	0.453817	0.441641	0.678915	0.623171	0.452298	0.57535
Phytanic acid	C01607	2.70912	2.44697	1.96809	2.38061	1.96671	1.55712	2.43239	2.3094	1.71965	1.2425	1.75043	1.51967	2.46174	2.00602	2.14677	2.26173	2.57567	1.95551	2.32401	1.99062	2.11721	1.92086	1.84624	2.22561
Nopaline	C01682	0.372405	0.522127	0.0829862	0.00151056	0.0389842	0.236486	0.00151056	0.00151056	0.00151056	0.00151056	0.00151056	0.00151056	0.00151056	0.00151056	0.00151056	0.00151056	0.00151056	0.00151056	0.00151056	0.00151056	0.00151056	0.00151056	0.00151056	0.00151056
Galactosylsphingosine	C01747	0.0136907	0.0136907	0.0136907	0.0136907	0.0136907	0.0136907	0.0136907	0.0136907	0.935273	1.0837	0.0136907	0.838683	1.18892	2.04146	1.66382	1.14766	2.08151	0.693142	0.855103	1.94324	0.0136907	0.0136907	0.0136907	1.55308
Desmosterol	C01802	0.00178719	0.00178719	0.00178719	0.460685	0.00178719	0.104096	0.165149	0.223089	0.238101	0.248028	0.115741	0.00178719	0.0933398	0.251619	0.316661	0.439022	0.475782	0.093649	0.188421	0.242934	0.25767	0.28547	0.152285	0.150302
Pyroglutamic acid	C01879	0.0836656	0.141044	0.333483	0.253518	0.150483	0.258006	0.00151056	0.186172	0.35091	0.466523	0.280032	0.461603	0.188632	0.638331	0.638816	0.429767	0.12847	0.452293	0.164823	0.094034	0.382778	0.516619	0.397041	0.0984693
Glycocholic acid	C01921	0.00178719	0.164992	0.173406	0.48021	0.00178719	0.197358	0.136945	0.466646	0.520174	0.542501	0.218491	0.235553	0.248054	0.639906	0.526128	0.530926	0.190919	0.410439	0.224021	0.486408	0.00178719	0.342796	0.123646	0.25536
Acetylcholine	C01996	0.69936	0.0373113	0.378857	0.857348	0.00151056	0.157833	0.459031	0.561662	0.828732	1.12014	0.498121	0.85065	1.52272	0.0825561	0.292927	1.23269	0.0544011	0.407976	0.366353	0.108175	0.334398	0.84133	0.00151056	0.490218
Acetyl-maltose	C02130	0.56377	0.306465	0.483481	0.189075	0.241952	0.150537	0.00151056	0.285024	0.132875	0.332937	0.302865	0.559639	0.599445	0.609481	0.456419	0.281303	0.327989	0.490865	0.66715	0.262763	0.747869	0.312365	0.27781	0.512888
Acetylpyruvate	C02132	0.00151056	0.00151056	0.00151056	0.124425	0.00151056	0.123329	0.00151056	0.137828	0.124735	0.195113	0.0860363	0.161161	0.00151056	0.00151056	0.209221	0.146854	0.00151056	0.167368	0.00151056	0.00151056	0.088235	0.168812	0.00151056	0.231214
GDP-L-galactose	C02280	0.00713899	0.00713899	0.162301	0.00713899	0.00713899	0.295456	0.00713899	0.00713899	0.13311	0.76475	0.208399	0.442506	0.371156	1.26137	0.00713899	0.378174	0.322695	0.110121	0.00713899	0.00713899	0.869271	0.00713899	0.249906	0.00713899
1-Methyladenosine	C02494	0.00151056	0.00151056	0.00151056	0.00151056	0.00151056	0.00151056	0.00151056	0.00151056	0.282276	0.33099	0.247232	0.392378	0.379852	0.0260406	0.00151056	0.00151056	0.00151056	0.00151056	0.00151056	0.00151056	0.00151056	0.00151056	0.00151056	0.00151056
L-Acetylcarnitine	C02571	5.70784	4.81718	10.9547	13.7435	4.15151	12.2637	11.0966	8.58569	14.3959	12.9227	12.7294	10.0429	7.41801	3.81661	7.72809	10.2223	5.64485	14.465	5.37044	5.90271	8.05621	12.7427	2.8837	14.98
Retinyl palmitate	C02588	1.48338	0.312574	1.13316	0.896698	0.374354	1.18209	1.06467	1.5755	1.85008	1.14576	1.50194	1.56447	1.61439	0.748149	0.669631	2.20685	0.919011	0.629545	0.976386	1.25317	1.49771	0.93154	1.69753	0.856695
Lithocholyltaurine	C02592	8.72499	2.38473	5.45974	6.16153	2.24196	5.59139	7.86424	6.73524	8.71569	8.43719	6.61709	7.18281	8.94661	1.84758	11.3296	5.871	3.08996	5.73645	6.33829	2.3581	9.22793	7.74781	1.57139	7.25516
N-Acetylputrescine	C02714	0.00151056	0.105175	0.27888	0.00151056	0.00151056	0.00151056	0.00151056	0.321035	0.774224	0.764211	0.608296	0.999254	1.37964	0.104263	0.00151056	0.00151056	0.267824	0.00151056	0.00151056	0.00151056	0.00151056	0.00151056	0.00151056	0.00151056
L-alpha-Aminocaprolactam	C02837	0.0880565	0.083334	0.0951288	0.00151056	0.0885808	0.0956782	0.00151056	0.0558079	0.0975841	0.180411	0.0667719	0.240701	0.103192	0.00151056	0.125159	0.00151056	0.143628	0.119976	0.0885465	0.0337537	0.00151056	0.00151056	0.218548	0.0549956
4-Acetamidobutanoic acid	C02946	0.00713899	0.590855	4.74042	0.00713899	0.00713899	0.7847	4.73869	2.73892	4.64869	4.84691	3.46762	7.16908	2.25119	3.45632	1.01568	0.00713899	2.39895	0.00713899	0.00713899	0.00713899	1.41686	0.00713899	1.4177	0.00713899
Maltose 6'-phosphate	C02995	0.00713899	0.00713899	0.00713899	0.470992	0.00713899	1.29497	0.25919	0.00713899	0.341734	0.913087	0.594512	1.04529	1.10623	1.12474	1.26343	0.744371	1.79486	0.5307	0.206432	0.00713899	0.00713899	0.727431	0.329906	0.00713899
10-Hydroxystearate	C03195	0.213066	0.133918	0.262001	0.314365	0.180992	0.405018	0.299092	0.264043	0.50302	0.41059	0.501289	0.269913	0.00713899	0.517168	0.151978	0.379433	0.377493	0.293535	0.367563	0.282543	0.253626	0.195523	0.230764	0.364554
6-Deoxyerythronolide B	C03240	0.171194	0.879458	0.536716	0.792547	0.131065	1.62267	1.16104	0.525156	0.616931	0.348365	1.16675	1.19821	1.76945	0.905839	0.00713899	0.389989	0.995619	1.27451	0.408839	0.618053	0.275749	0.640613	0.166748	0.142926
L-threo-3-Phenylserine	C03290	0.00151056	0.166595	0.00151056	0.197411	0.0652559	0.00151056	0.162649	0.186833	0.154427	0.308258	0.228704	0.228286	0.104189	0.00151056	0.156297	0.314214	0.219214	0.247217	0.00151056	0.0594842	0.00151056	0.406669	0.176881	0.307511
N2-Succinyl-L-arginine	C03296	0.0760524	0.0653042	0.299241	0.156755	0.141902	0.220324	0.631463	0.110412	0.184171	0.16414	0.274153	0.297764	0.130498	0.43174	0.225016	1.18519	0.803081	0.308532	0.166034	0.0635324	0.918719	0.388838	0.218675	0.330129
5-Aminoimidazole ribonucleotide	C03373	2.19294	2.32885	3.59961	4.34979	1.7636	2.96585	3.54555	0.00151056	0.00151056	3.53729	3.61033	4.15595	4.9939	2.60697	5.69584	0.00151056	3.35505	3.53838	0.00151056	0.00151056	2.34396	0.00151056	0.00151056	0.00151056
S-Inosyl-L-homocysteine	C03431	0.00151056	0.17577	0.334095	0.726572	0.185825	0.565546	0.757036	0.672215	0.577734	0.644132	0.614407	0.717194	0.00151056	0.00151056	0.413173	1.2628	0.43189	0.63906	0.356064	1.15814	0.384292	0.89339	0.143665	1.12705
3-alpha(S)-Strictosidine	C03470	0.00151056	0.288247	1.6728	0.719413	0.397186	0.353092	0.00151056	0.816135	0.489258	0.13766	0.355249	0.343182	0.751413	0.766488	0.861185	0.00151056	0.374931	0.279174	0.837946	0.864264	0.943281	0.00151056	0.425448	0.488636
L-2-Amino-3-oxobutanoic acid	C03508	0.136114	0.535284	0.0776845	0.680785	0.00151056	0.202533	0.00151056	0.249889	0.00151056	0.00151056	0.00151056	0.785219	0.00151056	0.00151056	0.00151056	0.261507	0.108253	0.00151056	0.00151056	0.00151056	0.00151056	0.00151056	0.00151056	0.00151056
LysoSM(d18:1)	C03640	2.1788	2.27408	2.49628	2.49118	2.46649	2.88049	2.95432	2.74487	2.93142	2.57179	2.88654	3.25261	2.13395	2.43799	2.3625	3.00483	2.70131	3.05474	1.80657	2.33766	2.65988	2.75236	2.34409	2.31
4-Imidazolone-5-propionic acid	C03680	1.09072	1.12389	2.1543	2.27946	0.905517	1.69367	1.44665	2.14884	2.79509	2.513	2.4173	2.92568	1.89433	0.608094	2.38423	3.57879	1.49223	3.03473	1.47233	0.964826	1.08006	3.81624	1.01075	3.24129
UDP-D-galacto-1,4-furanose	C03733	0.319691	0.258854	0.40976	0.752002	0.34273	0.473884	0.610569	0.728306	0.552349	0.660273	0.490351	0.733967	1.0631	0.767562	0.683212	0.465308	0.57279	0.906001	0.385561	0.958394	0.547407	0.5398	0.515646	0.785
gamma-Glutamylalanine	C03740	0.150844	0.0358824	0.0880879	0.2218	0.145253	0.00151056	0.00151056	0.00151056	0.00151056	0.00151056	0.189212	0.104836	0.0574397	0.304856	0.137279	0.230126	0.08274	0.263559	0.00151056	0.00151056	0.172403	0.00151056	0.00151056	0.0825653
Dopamine	C03758	0.00151056	0.241191	0.164368	0.250557	0.0793784	0.0684109	0.242599	0.268239	0.218995	0.438812	0.316014	0.287215	0.180485	0.00151056	0.232216	0.453992	0.280675	0.317366	0.0667863	0.138684	0.175111	0.547999	0.232671	0.421132
1H-Indol-3-ylacetyl-myo-inositol	C03868	8.16408	3.90273	2.61176	7.69528	0.910929	17.5931	13.5641	6.20198	17.1329	10.3108	9.17822	16.0758	0.00713899	4.99961	0.00713899	0.00713899	3.52983	3.82154	7.32708	9.69654	4.71046	1.07164	5.26973	1.00754
erythro-3-Hydroxy-Ls-aspartate	C03961	1.03443	0.149583	0.381937	0.380512	0.0638649	0.521538	0.428835	0.552969	0.439564	0.589856	0.990706	1.02232	0.0519401	0.994808	0.0550673	0.553218	0.233825	0.586706	0.0746178	0.63356	0.00151056	0.438734	0.00151056	0.922607
Tetrahydrodipicolinate	C03972	0.793684	0.169926	0.306375	0.245749	0.177419	0.412787	0.646125	0.181024	0.296888	0.561763	0.00151056	0.419084	0.188772	0.143553	0.496007	0.367299	0.174306	0.380362	0.306466	0.00151056	0.111081	0.278175	0.586902	0.111621
Beta-Tyrosine	C04368	1.5679	2.55565	2.36229	2.84431	1.65622	1.53283	2.6736	3.15066	2.64955	3.93591	3.33799	2.98332	2.77059	5.62484	2.7379	4.10624	3.048	3.24477	2.03441	1.71973	3.41606	4.95653	2.43834	4.34296
Aspartylglycosamine	C04540	0.915039	0.00151056	0.454449	1.18522	0.00151056	0.790536	1.23712	0.00151056	0.127783	0.00151056	0.685324	0.799886	0.00151056	0.0545101	0.329862	0.0951596	0.969428	0.091223	0.00151056	0.0853232	0.0934693	0.00151056	0.00151056	0.00151056
alpha-D-Galactosyl-(1,1')-sn-glycerol 3-phosphate	C04703	0.110963	0.0655006	0.179255	0.212458	0.108213	0.150779	0.130815	0.134028	0.220691	0.170987	0.258357	0.198882	0.0457055	0.239688	0.110184	0.273012	0.162892	0.216012	0.0630046	0.178135	0.00151056	0.126829	0.0680536	0.167055
8(R)-HPETE	C04822	2.53815	1.05701	7.24519	4.57844	0.0136907	0.0136907	3.55227	3.96985	1.34972	8.20409	4.05571	3.07054	7.45779	0.0136907	7.18559	2.16606	0.0136907	1.05478	4.09997	5.06376	6.95599	2.96658	6.30609	0.0136907
7-Dehydrodesmosterol	C05107	3.86357	2.81236	3.56071	6.62628	6.23141	5.14501	3.56087	3.82971	3.14307	3.23991	2.96866	3.65588	6.15497	3.50713	5.39919	3.83398	6.01035	2.30962	0.0136907	0.0136907	0.844177	0.0136907	1.85519	0.0136907
Taurocholic acid	C05122	0.402115	0.158563	0.333809	0.248546	0.00713899	0.00713899	0.00713899	0.175804	0.301191	0.393379	0.431171	0.253689	0.368902	0.879362	0.00713899	0.304683	0.00713899	0.259387	0.251075	0.614204	0.00713899	0.00713899	0.00713899	0.230055
2-(a-Hydroxyethyl)thiamine diphosphate	C05125	0.552739	0.280734	0.653513	0.479053	0.416125	0.619042	0.463909	0.498147	0.689064	0.81241	0.851377	0.801041	0.565639	0.789202	0.661128	0.891629	0.678427	0.708465	0.534986	0.900177	0.856351	0.904724	0.318786	0.890875
5'-Deoxyadenosine	C05198	8.70658	4.78183	4.59597	8.50798	9.24556	6.6811	11.9114	14.0096	10.3627	14.8133	11.0557	11.6112	10.8568	11.1535	13.3745	13.5545	11.037	12.2265	11.1729	10.0142	14.2186	12.5907	7.99837	14.3755
gamma-Glutamylglutamic acid	C05282	0.482637	0.126456	0.228244	0.435272	0.00151056	0.0396179	0.219717	0.228745	0.338137	0.644314	0.275274	0.473945	0.191476	0.301994	0.435927	0.468705	0.43399	0.290029	0.00151056	0.00151056	0.126535	0.22432	0.520413	0.0383094
beta-Alanyl-L-arginine	C05340	0.7565	1.61107	1.88283	0.636811	0.886818	1.34986	1.22832	1.62719	1.01791	0.73697	1.25156	0.84862	0.982141	0.880228	1.53103	0.696688	1.57742	0.707248	1.1525	1.26524	2.25713	1.2182	0.76058	0.776398
Nicotinuric acid	C05380	12.4502	12.633	24.0266	25.1282	9.88443	18.8857	16.0823	23.9069	30.661	27.0971	27.1259	32.0817	20.898	7.18879	26.3449	39.0574	16.2103	32.7417	17.4331	10.6679	11.4063	40.9347	11.0915	35.9044
Galactosylglycerol	C05401	0.00151056	0.0695387	0.0873858	0.00151056	0.00151056	0.00151056	0.00151056	0.0980655	0.128616	0.258265	0.145934	0.0710907	0.00151056	0.123366	0.34027	0.424465	0.00151056	0.00151056	0.00151056	0.117232	0.361129	0.441801	0.00151056	0.0870136
Ergosta-5,7,22,24(28)-tetraen-3beta-ol	C05440	0.701724	0.618843	0.313219	2.15437	0.00178719	0.460044	0.00178719	1.00195	0.787488	1.40547	0.811283	0.562314	0.335193	0.235005	1.99413	1.71693	0.48639	0.724632	0.00178719	3.77263	2.44267	1.21784	0.00178719	0.35914
Deoxycholic acid glycine conjugate	C05464	1.28517	1.58636	1.64358	1.73677	0.393836	1.42784	1.43321	1.10204	1.48874	1.3238	0.916619	1.8425	1.55729	0.473785	2.43855	1.21891	0.53958	1.23418	1.22682	0.563891	1.6232	1.52994	0.205835	1.21817
Chenodeoxycholic acid glycine conjugate	C05466	4.82675	5.78565	5.88433	6.51381	1.57215	4.77055	3.94822	4.57596	5.18978	4.50709	3.61398	6.4646	4.3709	1.41471	7.67921	4.08807	1.52972	4.67631	2.40007	2.07241	6.11176	3.55945	0.698203	5.43214
L-2-Aminoadipate adenylate	C05560	0.138589	0.00713899	0.308295	0.76308	0.247539	1.21907	0.00713899	1.23574	0.188688	1.29288	0.414807	1.21965	0.346461	1.25296	0.00713899	0.365115	1.88114	0.412852	0.00713899	0.681871	0.0845848	0.222012	1.7281	0.163707
4-Hydroxy-2-oxo-heptanedioate	C05601	0.00713899	0.241089	0.00713899	0.00713899	0.397215	0.228461	0.00713899	0.00713899	0.299534	0.351614	0.00713899	0.00713899	0.00713899	0.00713899	0.318318	0.00713899	0.00713899	2.05005	2.0242	2.01165	0.0852211	0.00713899	0.00713899	0.921131
5-Hydroxyindoleacetaldehyde	C05634	0.00151056	0.61957	0.308813	0.00151056	0.00151056	0.00151056	0.00151056	0.603398	2.93564	2.27765	1.32045	1.75891	0.00151056	0.00151056	0.407328	0.00151056	0.00151056	0.00151056	0.00151056	0.00151056	0.00151056	0.00151056	0.00151056	0.00151056
CMPciliatine	C05673	0.00151056	0.00151056	0.00151056	0.390166	0.00151056	0.0700317	0.00151056	0.00151056	0.281311	0.00151056	0.619614	0.40613	0.00151056	0.00151056	0.605629	0.100614	0.471693	0.0810246	0.00151056	0.00151056	0.285097	0.107031	0.441928	0.00151056
gamma-Amino-gamma-cyanobutanoate	C05715	0.421534	0.171534	0.396767	0.565306	0.119159	0.579148	0.00713899	0.276933	0.678027	1.26832	0.471753	0.986106	0.608537	0.747929	1.39959	1.40978	0.422634	1.03334	0.478731	0.335633	0.00713899	1.32297	0.533747	0.00713899
Biotinyl-5'-AMP	C05921	0.00713899	0.607467	0.635794	0.00713899	0.00713899	0.791658	0.00713899	0.995401	0.325808	0.00713899	0.00713899	0.130216	0.00713899	0.262292	0.229459	0.00713899	0.178012	1.54783	0.00713899	0.520455	0.00713899	0.00713899	0.31391	0.765946
Prostaglandin G2	C05956	35.9315	32.2947	33.1793	33.0121	35.9825	29.8651	45.4508	45.6729	51.1616	39.0706	33.6826	31.729	37.4536	32.1496	38.1566	33.7548	30.0883	31.3349	54.0951	53.6711	41.1548	54.2964	39.7273	39.76
D-arabino-Hex-3-ulose 6-phosphate	C06019	4.33477	2.08582	5.03432	3.92704	1.94395	4.13208	4.54059	4.48195	9.06063	6.08695	8.23503	7.75146	10.3932	10.197	6.83137	8.08204	3.43816	8.19129	6.7814	8.67667	7.06857	2.99582	7.60427	1.57916
Adipic acid	C06104	0.430534	0.675864	0.652205	0.742502	0.551492	0.591036	0.650319	0.543715	0.517679	0.544513	0.613924	0.599519	0.459352	0.52686	0.653723	0.508092	0.55904	0.573596	0.388896	0.432305	0.650312	0.447407	0.476527	0.424414
gamma-Glutamyl-beta-aminopropiononitrile	C06114	0.408641	0.167309	0.612088	0.518218	0.164323	0.0592714	0.672942	0.400346	0.823094	0.81182	0.707835	0.567695	0.00151056	1.51726	0.611901	0.822031	0.137941	0.60594	0.619296	0.108456	0.428052	1.17702	0.168739	0.56225
3-Ketosphingosine	C06121	4.08481	2.06159	1.92089	0.0136907	0.0136907	1.38858	0.0136907	9.03133	2.77572	0.0136907	9.92623	9.07937	0.0136907	0.0136907	2.28218	1.3603	0.0136907	0.0136907	0.0136907	0.0136907	4.65993	1.08361	0.0136907	0.0136907
Hexadecenal	C06123	1.9278	1.83326	2.41458	2.52954	1.62231	2.52128	2.19291	1.9384	2.3625	1.35042	1.86416	1.72989	2.09084	2.25741	2.13599	2.08182	1.49052	1.8798	2.14156	2.88147	2.17198	1.76497	0.837274	2.21205
Sphingosine 1-phosphate	C06124	1.29995	1.38563	1.77219	1.28132	1.4135	1.75269	2.21491	2.14367	1.64894	1.11376	2.28799	1.39637	2.01152	1.47018	1.46451	1.78374	1.04186	1.56701	2.0415	2.12619	2.47049	1.54496	1.51426	1.81973
Ectoine	C06231	1.35933	0.196314	0.394553	0.492032	0.00151056	0.124631	2.02941	0.221474	0.00151056	0.00151056	0.74359	0.396176	1.24772	0.509779	0.111152	0.204121	0.680306	0.00151056	0.502309	0.00151056	0.00151056	0.00151056	0.00151056	0.00151056
Biopterin	C06313	0.00151056	0.130849	0.236246	0.313184	0.258353	0.351519	0.00151056	0.22375	0.28658	0.27009	0.0996367	0.374964	0.207192	0.183711	0.456203	0.323727	0.157654	0.303025	0.0551737	0.133412	0.33471	0.400555	0.147445	0.275736
7-a,27-Dihydroxycholesterol	C06341	4.46306	4.0399	5.29585	2.19298	4.23372	3.86616	0.0136907	5.08289	3.34783	2.68986	4.27809	2.76894	4.50607	2.61082	2.8253	2.6375	4.3408	3.02047	4.04336	4.29926	2.95457	4.03174	3.56065	4.66886
Arachidic acid	C06425	0.225825	0.00713899	0.00713899	0.380923	0.00713899	0.00713899	0.00713899	0.00713899	0.350458	0.00713899	0.525328	0.00713899	0.00713899	0.3958	0.00713899	0.00713899	0.00713899	0.00713899	0.286192	0.409033	0.403499	0.364194	0.00713899	0.309106
Alpha-Linolenic acid	C06427	0.259691	0.283087	0.530451	0.480565	0.415561	0.554026	0.655857	0.297332	0.424172	0.462472	0.51366	0.739528	0.323007	0.259264	0.517655	0.444556	0.367314	0.37473	0.314825	0.28485	0.771276	0.695688	0.271378	0.419159
Eicosapentaenoic acid	C06428	1.02792	0.889068	1.90973	1.98236	0.00178719	1.61789	2.3271	1.39837	1.90482	2.17606	2.29094	2.43952	3.44748	0.488426	1.85198	2.23712	1.0041	2.10816	2.31492	2.98548	0.619213	2.96154	1.94403	1.74041
Guanidinoproclavaminic acid	C06657	0.00151056	0.00151056	0.00151056	0.199602	0.00151056	0.202641	0.00151056	0.159972	0.156963	0.166295	0.0814994	0.109319	0.00151056	0.00151056	0.0923938	0.00151056	0.00151056	0.00151056	0.00151056	0.00151056	0.00151056	0.00151056	0.00151056	0.00151056
Behenic acid	C08281	2.50271	1.26382	1.16566	5.58874	1.31849	3.47208	3.28379	3.46885	4.33157	4.62139	4.0746	3.83588	4.80895	5.24183	3.94805	5.25112	2.52547	2.53405	2.28189	3.26662	3.10018	3.77316	3.25914	3.60207
Erucic acid	C08316	0.00713899	0.00713899	0.00713899	0.595589	0.412805	0.364368	0.00713899	0.538631	0.00713899	0.716776	1.11974	0.672454	0.00713899	0.510472	0.00713899	0.00713899	0.318742	0.548886	0.00713899	0.393686	0.00713899	0.438147	0.00713899	0.550411
Tetracosanoic acid	C08320	0.296709	0.201556	0.00713899	1.18576	0.748322	0.803204	0.598816	0.564926	0.181664	0.811711	0.600055	1.32426	0.683436	0.809705	0.226664	1.04384	0.675031	0.984059	1.0457	0.570111	0.564528	0.739788	0.715139	1.18767
Nervonic acid	C08323	0.00713899	0.00713899	0.00713899	0.446584	0.00713899	0.493405	0.374261	0.565943	0.546187	0.592048	0.423425	0.805124	0.00713899	0.78191	0.00713899	0.532035	0.99161	0.00713899	0.00713899	0.00713899	0.00713899	0.998221	0.197424	0.00713899
Palmitoleic acid	C08362	1.25608	0.319035	1.11406	1.13067	0.529766	0.90633	1.09258	1.52655	0.937491	0.874511	1.20649	0.77107	1.39573	2.11758	1.02268	1.16676	0.948246	1.04895	1.16911	1.731	0.978497	0.829394	0.601022	0.766308
Vaccenic acid	C08367	0.717942	0.276003	0.365057	0.752834	0.36614	0.563368	1.27974	0.383845	0.741697	0.698993	0.636476	0.713027	0.581554	0.137571	1.11385	0.843384	0.486595	0.646896	0.583286	0.556949	1.42764	0.959802	1.42396	0.507626
THF-L-glutamate	C09332	0.571117	0.1931	0.620086	0.00151056	0.105546	0.496259	1.05045	1.52965	1.6	0.898858	1.17445	1.04096	0.203289	1.39229	1.12811	0.750583	0.390781	0.597238	0.159468	1.20473	0.954073	0.822312	0.183393	1.08884
Naringin	C09789	0.00713899	0.00713899	0.334951	0.00713899	0.00713899	0.00713899	0.00713899	0.295618	0.209706	0.00713899	0.170932	0.11499	0.00713899	0.369919	0.00713899	0.00713899	0.00713899	0.326005	0.00713899	0.0846741	0.27252	0.00713899	0.00713899	0.00713899
Tomatidine	C10826	0.0136907	0.0136907	1.56237	0.0136907	0.988877	0.0136907	1.41442	0.0136907	1.55005	1.66476	2.7034	2.56404	0.0136907	1.80251	1.5925	2.3307	2.02604	2.46971	0.0136907	1.68199	1.37605	0.0136907	0.0136907	0.0136907
3alpha,12alpha-Dihydroxy-5beta-chol-6-enoate	C11637	0.191906	0.0844846	0.147539	0.229517	0.172931	0.143921	0.00151056	0.207035	0.00151056	0.101524	0.184783	0.00151056	0.00151056	0.00151056	0.142536	0.270093	0.0992273	0.111112	0.110019	0.00151056	0.00151056	0.00151056	0.067968	0.00151056
Anandamide	C11695	3.33035	1.34818	8.32243	4.9308	0.0136907	1.60372	3.79144	10.3115	5.37356	10.1708	10.333	5.12453	8.37053	0.0136907	8.42088	2.78208	0.754997	1.07012	5.15427	6.22984	8.34208	3.54181	7.9182	0.890151
(5Z,7E,9E,14Z,17Z)-Eicosapentaenoic acid	C12083	0.172536	0.21042	0.312512	0.29194	0.194002	0.336732	0.303127	0.332779	0.519	0.271346	0.40118	0.477719	0.261015	0.248119	0.235443	0.302696	0.379541	0.32978	0.29323	0.315985	0.309107	0.301684	0.280471	0.307183
cADPR	C13050	0.360492	0.00151056	0.338373	0.458725	0.093094	0.148153	0.204394	0.684997	0.504193	0.614952	0.470116	0.521566	0.256864	0.00151056	0.38554	0.514837	0.300735	0.348386	0.243192	0.00151056	0.205189	0.745544	0.10454	0.479949
Octadecanamide	C13846	3.47725	3.52397	4.58442	2.57144	2.28415	4.45865	1.75745	3.57454	3.61997	2.65578	2.39273	2.31944	3.58969	5.08683	4.16894	3.28562	4.31433	1.95883	4.02606	6.25729	4.02827	3.03905	3.89876	6.56476
20-Hydroxyeicosatetraenoic acid	C14748	0.0136907	0.0136907	3.74818	2.10509	0.0136907	0.0136907	0.0136907	2.4173	4.26902	0.0136907	1.98405	1.53176	3.67635	0.0136907	4.16627	1.52017	0.0136907	0.0136907	2.08161	2.57751	1.51802	3.63675	0.0136907	0.0136907
19(S)-HETE	C14749	0.0136907	0.0136907	0.0136907	0.0136907	0.0136907	0.0136907	0.0136907	0.0136907	0.0136907	0.771919	0.887762	1.15671	0.0136907	0.0136907	1.45408	1.0929	0.0136907	0.664457	1.17695	1.71003	2.39507	0.947064	1.43331	1.51977
9,10-DHOME	C14828	1.7034	1.64302	1.79513	2.14216	2.18878	1.57399	1.96024	1.95555	1.3402	1.0281	1.35317	1.80802	1.77166	1.79951	1.90101	1.93912	2.0785	1.99455	1.59222	1.66283	1.80669	1.63857	1.81006	1.81299
2-S-Glutathionyl acetate	C14862	0.388215	0.00713899	0.341139	0.00713899	0.0841648	0.00713899	0.00713899	0.00713899	0.00713899	0.00713899	0.157221	0.00713899	0.470142	0.00713899	0.314813	0.00713899	0.354963	0.557825	0.655115	0.00713899	0.00713899	0.00713899	0.00713899	0.547171
S-(2-Chloroacetyl)glutathione	C14864	0.00151056	0.0342751	0.17462	0.114513	0.060298	0.00151056	0.00151056	0.00151056	0.00151056	0.00151056	0.157188	0.00151056	0.00151056	0.00151056	0.222455	0.00151056	0.00151056	0.00151056	0.00151056	0.00151056	0.202712	0.00151056	0.13537	0.0468561
Purine	C15587	1.27981	1.04456	0.192325	2.03888	1.04043	0.141081	0.282393	1.03338	0.342016	0.00713899	2.90041	1.78971	2.79987	4.0099	0.00713899	0.34288	2.12591	2.15061	2.66184	0.17906	3.22038	0.00713899	1.42339	1.85238
4-(Glutamylamino) butanoate	C15767	0.12207	0.0845436	0.00151056	0.317968	0.274689	0.00151056	0.43406	0.00151056	0.336354	0.368502	0.130805	0.299735	0.0845692	0.222346	0.241482	0.475494	0.2342	0.252025	0.00151056	0.107926	0.509575	0.858174	0.833298	0.00151056
Episterol	C15777	7.12256	8.21644	12.9807	12.9913	10.6754	7.60801	6.51454	9.43046	6.46404	9.32579	7.33469	9.99829	0.913768	6.73377	14.2755	9.00263	10.0936	6.2275	7.00867	6.13533	7.04585	6.90196	7.3141	6.74415
5,7,24(28)-Ergostatrienol	C15778	5.70467	7.28845	7.23789	9.37043	6.79196	7.1143	7.20005	6.60257	7.64377	8.28078	7.94469	6.88679	8.79868	6.88907	6.93482	7.66351	7.94398	8.50863	8.33634	6.79958	6.90932	7.82228	6.98109	7.86319
5-Dehydroepisterol	C15780	1.50027	1.8646	1.85938	2.46953	1.81739	1.72071	1.71432	1.76702	1.94304	2.13453	2.04597	1.79681	2.14813	1.69526	1.8235	2.03967	2.03191	2.32085	1.96301	1.74796	1.81044	1.89766	1.7339	2.15284
24-Methylenecholesterol	C15781	1.12884	1.30585	1.99898	2.01219	1.75542	1.15202	1.0153	1.39315	0.969099	1.42302	1.23654	1.71495	0.00178719	0.961366	2.2795	1.38959	1.61861	1.02713	1.09574	0.853026	1.10838	1.01815	1.05508	1.02862
3-Keto-4-methylzymosterol	C15816	37.397	43.8478	43.314	48.7628	46.5903	42.1859	40.3345	38.3682	45.8743	35.4754	47.0641	40.152	59.0003	47.5756	51.0595	46.4844	51.181	49.7911	41.6029	40.6252	38.9107	45.1479	45.806	46.7109
UDP-L-Ara4FN	C16154	0.00151056	0.00151056	0.00151056	0.177024	0.00151056	0.164918	0.00151056	0.00151056	0.00151056	0.15211	0.0922582	0.00151056	0.0971249	0.00151056	0.122329	0.0959589	0.166848	0.00151056	0.00151056	0.00151056	0.00151056	0.00151056	0.00151056	0.434168
5-Hydroxyectoine	C16432	0.894898	0.755157	1.79309	0.232016	0.497582	1.15238	0.838731	1.5506	0.603143	3.80362	1.15396	1.65244	2.66817	0.34111	1.33767	0.523444	0.715779	0.558204	2.12049	0.360257	1.18728	1.03969	0.261058	0.348927
S-(Indolylmethylthiohydroximoyl)-L-cysteine	C16518	0.00713899	0.149561	0.164826	0.597292	0.478751	0.295015	0.00713899	0.197954	0.915609	0.970357	0.437085	1.27117	0.00713899	1.44574	0.173122	1.36778	0.916193	0.676045	0.00713899	0.997271	0.227744	0.694664	0.67656	0.423026
N-Acetylmuramic acid 6-phosphate	C16698	0.40342	0.814174	0.877559	0.732854	0.512197	0.789068	0.703799	0.572319	0.852012	0.743023	0.822163	0.627666	0.493562	0.372737	0.896776	0.410791	0.898618	0.484851	0.584458	0.573436	1.31375	0.68554	0.430275	0.59319
Tridecanoic acid	C17076	0.467778	0.2862	0.516765	0.88463	0.495337	0.666286	0.694675	0.541549	0.470013	0.622618	0.517984	0.597218	0.768238	0.512153	1.20011	0.607153	0.874096	0.547669	0.495173	0.3371	0.545842	0.514737	0.540889	0.385658
Pregnenolone sulfate	C18044	0.77024	0.671087	1.30567	0.411955	0.892174	1.11596	0.150444	0.668779	0.675531	0.702648	0.778054	1.72445	0.883045	0.541439	1.20202	2.10576	0.490394	4.47086	0.581287	0.555914	0.84483	4.36335	0.00713899	3.21671
N1-trans-Feruloylagmatine	C18325	0.00151056	0.00151056	0.177063	0.178321	0.177529	0.00151056	0.00151056	0.134909	0.24417	0.119108	0.110206	0.236348	0.00151056	0.0704565	0.086745	0.253536	0.500376	0.0575358	0.00151056	0.11286	0.0467521	0.241132	0.00151056	0.913127
cis-9,10-Epoxystearic acid	C19418	0.00713899	0.00713899	0.00713899	0.00713899	0.00713899	0.235022	0.00713899	0.00713899	0.00713899	0.00713899	0.00713899	0.00713899	0.836349	0.00713899	0.656561	0.00713899	0.494242	0.565767	0.00713899	0.00713899	0.608465	0.650088	0.00713899	0.657877
9,10-Epoxy-18-hydroxystearate	C19620	0.00713899	0.00713899	0.00713899	0.362032	0.00713899	0.00713899	0.374314	0.00713899	0.504041	0.384049	0.705742	0.00713899	0.836784	0.47236	0.00713899	0.00713899	0.00713899	0.00713899	0.477177	0.00713899	0.470564	0.179594	0.00713899	0.00713899
9,10-Dihydroxystearate	C19622	0.163877	0.00713899	0.00713899	0.00713899	0.00713899	0.00713899	0.00713899	0.481515	0.371447	0.00713899	0.601067	0.63214	0.00713899	0.00713899	0.00713899	0.00713899	0.00713899	0.00713899	0.00713899	0.00713899	0.487346	0.00713899	0.00713899	0.00713899
22-Hydroxydocosanoate	C19623	27.1978	31.8729	49.7252	49.807	41.12	28.3139	24.8929	35.3175	24.0321	36.792	26.4138	38.0681	3.65996	24.9438	53.9859	34.378	38.2685	22.8252	26.5409	23.1643	27.5597	25.5012	26.9406	26.016
22-Oxodocosanoate	C19624	0.00178719	0.675261	0.930011	1.08665	1.52761	2.04661	0.00178719	0.928289	1.06726	0.967768	1.19044	2.13138	0.00178719	0.934898	1.59722	1.08215	2.92958	2.05616	0.835612	0.743668	0.947806	1.00093	2.71092	2.0788
Docosanedioate	C19625	220.786	226.009	207.431	226.552	221.811	205.841	219.821	214.583	211.122	232.612	218.362	213.955	209.364	227.421	213.884	229.426	218.007	213.431	224.825	211.562	224.785	228.518	203.577	204.626
UDP-2,3-diacetamido-2,3-dideoxy-alpha-D-glucuronate	C19725	0.00713899	0.00713899	0.00713899	0.745577	0.00713899	1.23826	1.10454	0.665804	1.34638	1.11823	0.877956	1.501	1.02472	0.965184	1.38554	0.763654	1.07517	0.706628	0.00713899	0.00713899	0.539599	0.56288	0.528649	0.00713899
beta-Alaninamide	C19779	12.5624	9.72349	13.2575	20.4233	5.09055	13.5304	27.7018	27.5687	33.3687	20.671	26.5027	24.118	31.2985	5.80738	23.2467	25.4864	0.00151056	25.5747	23.6498	41.9704	22.835	32.5834	9.33411	35.6987
Bis(1L-myo-inositol)-3,1'-phosphate 1-phosphate	C19799	1.53971	0.123138	0.815635	1.94284	0.00713899	0.00713899	0.00713899	0.00713899	3.50585	1.1648	0.978583	0.250528	6.66838	0.00713899	0.83975	9.33832	0.269965	0.68613	0.34557	6.17819	0.00713899	0.00713899	0.00713899	0.861916
Arabidiol	C19828	0.00178719	0.00178719	0.00178719	0.173769	0.00178719	0.233989	0.00178719	0.00178719	0.00178719	0.00178719	0.143432	0.178166	0.169669	0.100556	0.189589	0.244127	0.203794	0.133421	0.00178719	0.129467	0.00178719	0.00178719	0.00178719	0.00178719
Indole-3-carboxylic acid	C19837	0.00151056	0.00151056	0.00151056	0.00151056	0.00151056	0.00151056	0.00151056	0.13183	0.110599	0.157435	0.21854	0.198593	0.00151056	0.00151056	0.00151056	0.00151056	0.131958	0.00151056	0.00151056	0.00151056	0.00151056	0.591082	0.00151056	0.00151056
(8E,10R,12Z)-10-Hydroperoxy-8,12-octadecadienoate	C19937	2.74452	2.85997	3.007	2.25181	2.5345	2.15403	3.46563	3.60091	3.70743	3.38898	2.40016	3.47308	3.14397	2.10225	2.8385	2.06472	2.22597	2.16311	4.30367	3.2162	4.23135	2.46081	2.95775	3.21722
3,22-Dimethyl-1,2,23,24-tetradehydro-2,3,22,23-tetrahydrosqualene	C20412	0.00178719	0.00178719	0.120753	0.319804	0.00178719	0.00178719	0.00178719	0.00178719	0.288684	0.255327	0.176688	0.257657	0.460797	0.0784857	0.393095	0.421598	0.00178719	0.270174	0.290026	0.122059	0.197567	0.306304	0.00178719	0.289738
Versiconal	C20507	0.00713899	0.167081	0.20712	0.230413	0.00713899	0.446074	0.00713899	0.00713899	0.305537	0.566868	0.375185	0.899484	0.473845	0.00713899	0.226596	0.699083	0.00713899	0.925986	0.00713899	0.550443	0.00713899	0.513322	0.00713899	0.00713899
beta-Citryl-L-glutamate	C20775	0.00151056	0.13973	0.00151056	0.00151056	0.183152	0.248097	0.00151056	0.245239	0.0941835	0.0983636	0.226941	0.0903245	0.102526	0.146301	0.337538	0.0717381	0.286958	0.0775104	0.200776	0.276745	0.492193	0.192162	0.146178	0.00151056
Tabtoxin	C20917	1.16653	0.910381	0.317071	0.856312	1.20626	0.634692	0.319072	0.940457	0.432466	0.294665	0.841309	0.888056	0.559704	0.344422	0.342053	0.753297	0.298755	0.622997	0.325911	0.579457	0.604606	0.668464	0.261672	0.505318
Tabtoxinine-beta-lactam	C20918	0.551509	0.169923	0.399324	0.471958	0.0959202	0.896158	0.00151056	0.405155	0.121334	0.00151056	0.197951	0.187005	0.163092	0.406021	0.443819	0.401119	0.185674	0.582049	0.00151056	0.26595	0.233632	0.00151056	0.0763691	0.0841674
Isotabtoxin	C20919	2.5966	6.8542	2.64395	6.23635	9.08592	4.16779	4.94069	7.08279	3.81286	2.46694	6.59634	6.87156	4.86376	2.73544	3.18322	5.84046	2.45974	4.41941	2.58944	4.75195	4.51997	5.28997	1.96126	3.04434
Tabtoxinine-delta-lactam	C20920	0.762026	0.0923935	0.0704504	0.951703	1.09755	1.05499	1.68504	0.719022	0.586086	1.12331	1.70162	1.2348	0.124023	0.451075	0.203784	0.385083	0.955854	0.465452	0.92389	0.149083	0.575911	0.663804	0.482848	0.0541408
S-(L-Histidin-5-yl)-L-cysteine S-oxide	C20993	0.229255	0.0936749	0.42397	0.310692	0.155563	0.123841	0.36827	0.159614	0.331624	0.355256	0.198999	0.00713899	0.42252	0.446559	0.0931568	0.00713899	0.00713899	0.194449	0.181996	0.454651	0.404159	0.330299	0.428978	0.241883
gamma-L-Glutamyl-L-2-aminobutyrate	C21015	0.927065	0.604171	2.4487	1.20032	0.501418	0.636534	1.26089	0.76217	1.39691	0.657717	0.708879	1.18517	0.582023	1.27027	1.70763	0.756067	0.409086	0.667789	1.02976	0.821745	1.07325	1.02448	0.516233	0.518222
(25S)-26-Oxocholest-4-en-3-one	C21304	0.0136907	0.845373	1.06941	1.19397	0.0136907	0.0136907	0.0136907	1.51269	3.40238	2.16201	1.08021	1.80039	2.30744	0.0136907	1.60123	2.04457	0.728608	0.993788	2.44555	2.35765	1.37577	1.58087	3.00313	2.4651
CMP-KDN	C21384	0.00713899	0.00713899	0.00713899	0.00713899	0.00713899	0.00713899	0.00713899	2.99041	5.12205	4.78465	5.47432	5.24363	0.00713899	0.00713899	0.00713899	0.00713899	0.00713899	0.00713899	0.00713899	0.00713899	0.00713899	0.00713899	0.00713899	0.00713899
1-(3,4-Dimethoxyphenyl)-2-(2-methoxyphenoxy)propane-1,3-diol	C21419	0.505998	0.859467	0.940818	0.891206	0.509197	0.828478	1.69735	1.06534	0.501238	0.00151056	0.632303	1.60998	0.601709	0.859813	0.795982	0.868741	0.795595	0.874758	0.935684	0.933767	1.13111	0.745909	0.586724	0.544411
